# Supplementary material for: モーゴイルベアリングのハイドロマスタテイック潤滑油装置の概要 (製鉄機械(炉,圧延設備)(特集))
Source: MDPI journal article supplement (doi:10.3390/ijms24043498), 1969-08-01
Supplement: s1 [file s1]

# Supplementary Material

## 1 Supplementary Figures and Tables

### 1.1 Supplementary Figures

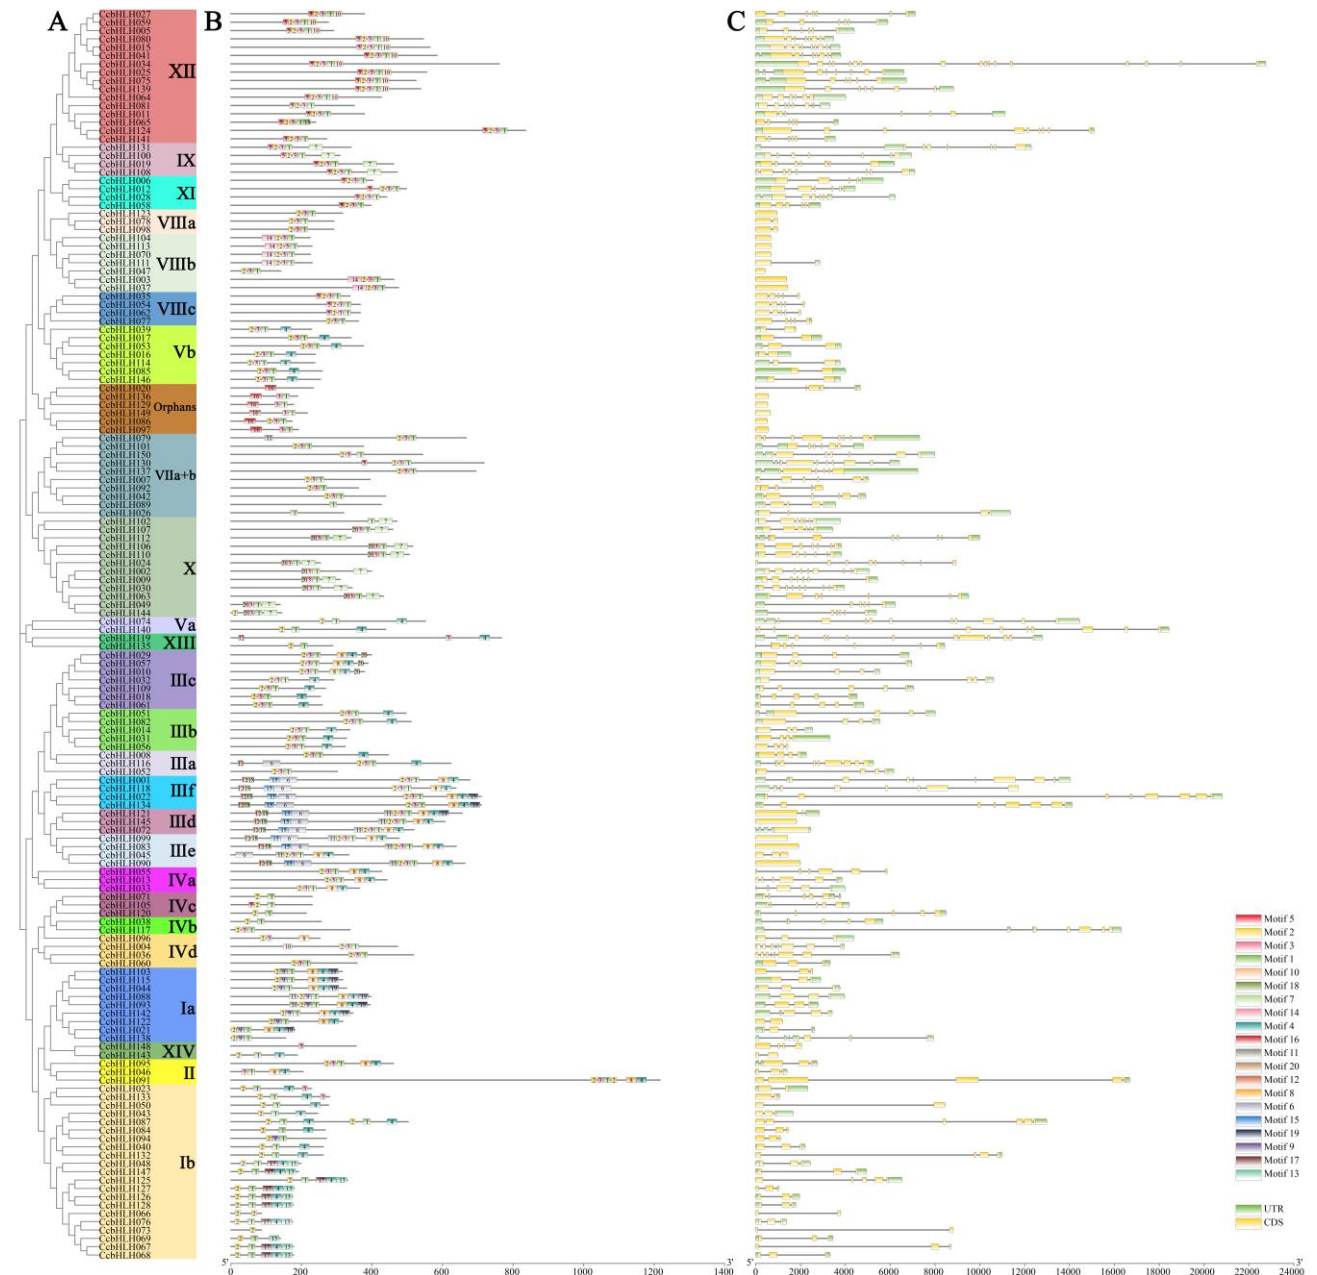

**Figure S1.** Phylogenetic relationships, conserved motifs, and gene structures of the *CcbHLH* genes. (A) Phylogenetic trees of 150 *CcbHLH* proteins. The 26 subfamilies are marked with different background colours. (B) Conserved motifs of 150 *CcbHLH* proteins. Twenty motifs are illustrated by boxes of different colours. (C) Gene structures of 150 *CcbHLH*s. Coding sequence and untranslated regions are shown in yellow and green boxes; introns are shown in black lines.

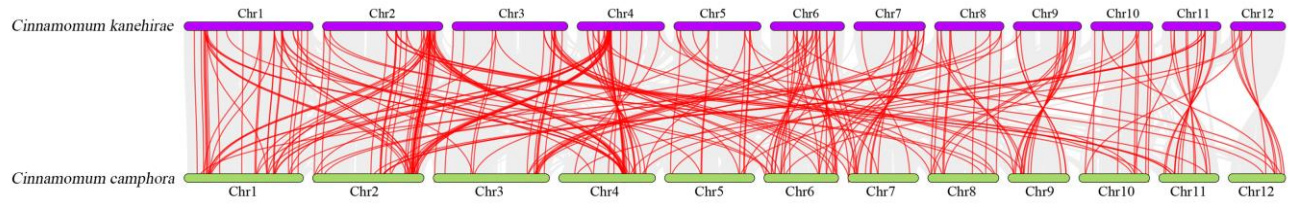

**Figure S2.** Collinearity analysis of the *bHLH* TF family in *C. camphora* and *C. kanehirae*. Red lines link identified collinear genes.

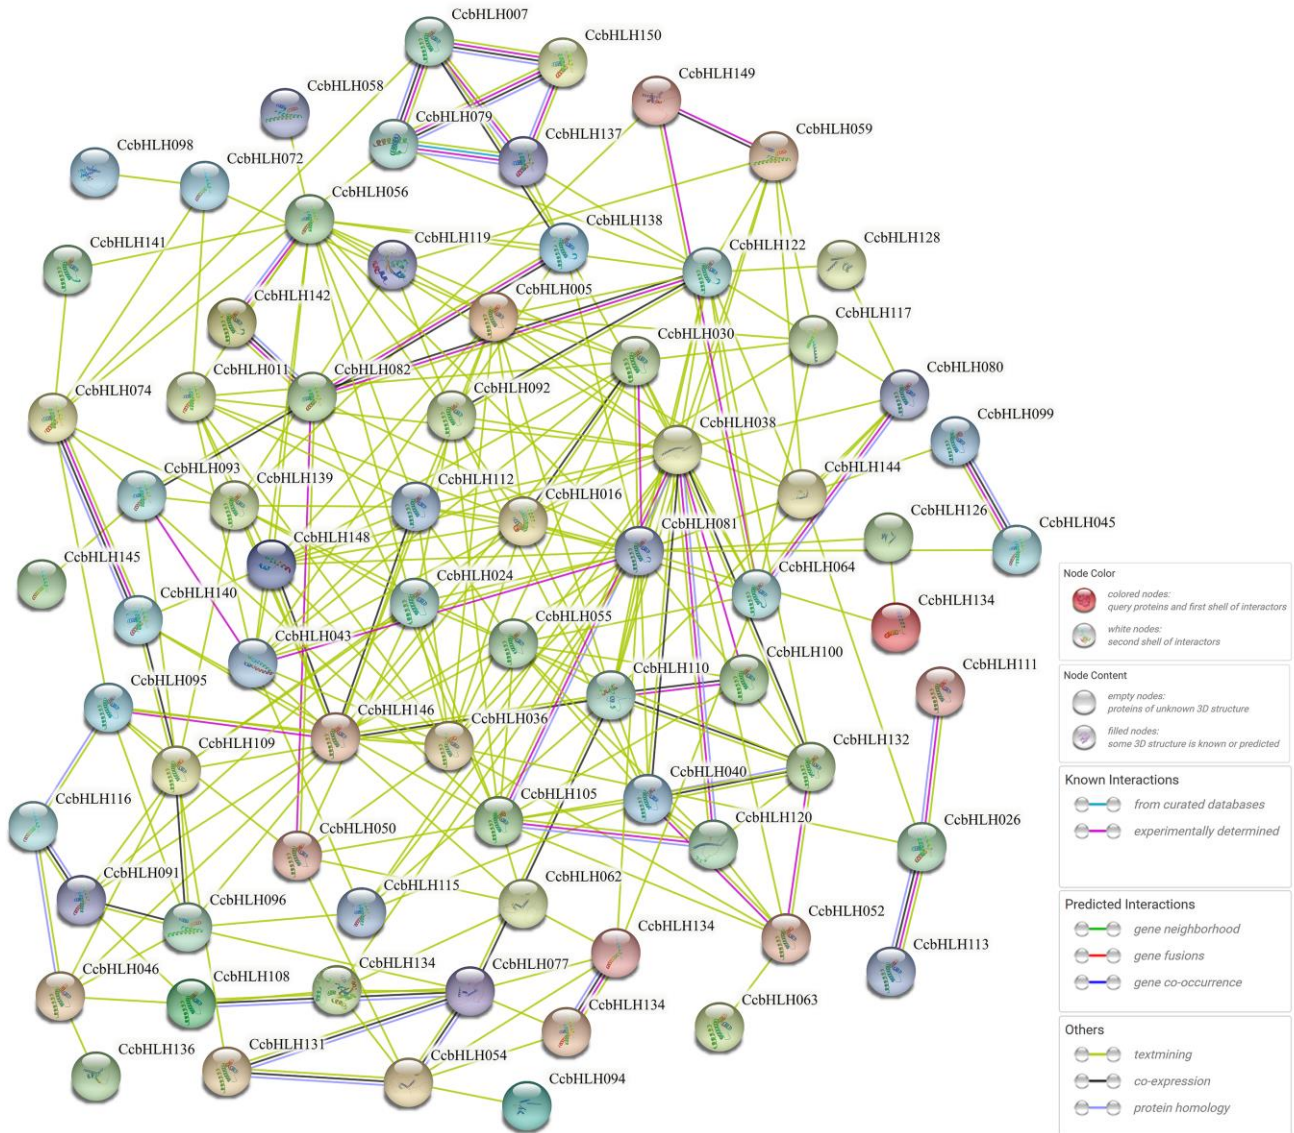

**Figure S3.** Protein interaction network for CcbHLHs according to CcbHLHs orthologs in *Arabidopsis thaliana*.

## 1.2 Supplementary Tables

**Table S1.** Basic protein information of CcbHLH family members

| No.           | Gene name        | Chr  | Location |          | MW (kDa) | pI    | I. I. | Protein (aa) | GRAVY  |
|---------------|------------------|------|----------|----------|----------|-------|-------|--------------|--------|
| Ccam01G000415 | <i>CcbHLH001</i> | Chr1 | 8633570  | 8647748  | 76.08    | 5.26  | 52.34 | 677          | -0.445 |
| Ccam01G000702 | <i>CcbHLH002</i> | Chr1 | 12930089 | 12935151 | 43.72    | 7.2   | 64.05 | 398          | -0.57  |
| Ccam01G000808 | <i>CcbHLH003</i> | Chr1 | 14628373 | 14629758 | 50.76    | 5.76  | 45.79 | 461          | -0.552 |
| Ccam01G000843 | <i>CcbHLH004</i> | Chr1 | 15329593 | 15333546 | 54.51    | 6.48  | 46.81 | 472          | -0.344 |
| Ccam01G000875 | <i>CcbHLH005</i> | Chr1 | 15868845 | 15873244 | 31.63    | 5.62  | 54.2  | 290          | -0.576 |
| Ccam01G000952 | <i>CcbHLH006</i> | Chr1 | 17043099 | 17048786 | 44.02    | 6.11  | 50.64 | 402          | -0.654 |
| Ccam01G001268 | <i>CcbHLH007</i> | Chr1 | 23768793 | 23773817 | 43.52    | 6.67  | 64.81 | 394          | -0.676 |
| Ccam01G001621 | <i>CcbHLH008</i> | Chr1 | 38514404 | 38516661 | 49.48    | 4.99  | 39.35 | 446          | -0.758 |
| Ccam01G001836 | <i>CcbHLH009</i> | Chr1 | 47450836 | 47456267 | 33.74    | 6.66  | 74.67 | 309          | -0.561 |
| Ccam01G001867 | <i>CcbHLH010</i> | Chr1 | 48228951 | 48234486 | 42.88    | 4.79  | 58.24 | 378          | -0.523 |
| Ccam01G002223 | <i>CcbHLH011</i> | Chr1 | 55521306 | 55532421 | 41.19    | 5.44  | 56.15 | 378          | -0.579 |
| Ccam01G002231 | <i>CcbHLH012</i> | Chr1 | 55640969 | 55645405 | 55.01    | 7.14  | 56.55 | 497          | -0.618 |
| Ccam01G002454 | <i>CcbHLH013</i> | Chr1 | 59853203 | 59857053 | 49.66    | 6.68  | 52.9  | 442          | -0.423 |
| Ccam01G002485 | <i>CcbHLH014</i> | Chr1 | 60343673 | 60346213 | 38.04    | 5.07  | 61.73 | 336          | -0.526 |
| Ccam01G003092 | <i>CcbHLH015</i> | Chr1 | 70033610 | 70037365 | 60.93    | 5.64  | 51.28 | 564          | -0.653 |
| Ccam01G003242 | <i>CcbHLH016</i> | Chr1 | 72247038 | 72248607 | 26.75    | 9.21  | 57.47 | 239          | -0.585 |
| Ccam01G003485 | <i>CcbHLH017</i> | Chr1 | 76487044 | 76489984 | 37.4     | 6.2   | 52.5  | 340          | -0.495 |
| Ccam02G000043 | <i>CcbHLH018</i> | Chr2 | 908842   | 913367   | 28.9     | 5.37  | 53.19 | 253          | -0.528 |
| Ccam02G000340 | <i>CcbHLH019</i> | Chr2 | 5985187  | 5991369  | 49.3     | 6.89  | 62.71 | 461          | -0.634 |
| Ccam02G001398 | <i>CcbHLH020</i> | Chr2 | 38979237 | 38983895 | 26.48    | 11.42 | 75.3  | 233          | -0.766 |
| Ccam02G001693 | <i>CcbHLH021</i> | Chr2 | 45180672 | 45183304 | 20.15    | 8.37  | 67.29 | 181          | -0.086 |
| Ccam02G001706 | <i>CcbHLH022</i> | Chr2 | 45365203 | 45385997 | 79.78    | 5.64  | 59.56 | 709          | -0.611 |
| Ccam02G001730 | <i>CcbHLH023</i> | Chr2 | 45830135 | 45832458 | 25.39    | 9.51  | 56.11 | 228          | -0.56  |
| Ccam02G001915 | <i>CcbHLH024</i> | Chr2 | 48708183 | 48717113 | 28.39    | 9.22  | 53.99 | 253          | -0.714 |
| Ccam02G002109 | <i>CcbHLH025</i> | Chr2 | 52039524 | 52046134 | 59.33    | 5.67  | 49.14 | 554          | -0.549 |
| Ccam02G002686 | <i>CcbHLH026</i> | Chr2 | 61901018 | 61912375 | 34.81    | 5.02  | 54.63 | 319          | -0.619 |
| Ccam02G002773 | <i>CcbHLH027</i> | Chr2 | 63379787 | 63386905 | 41.12    | 7.15  | 48.97 | 378          | -0.499 |
| Ccam02G002908 | <i>CcbHLH028</i> | Chr2 | 65370732 | 65376956 | 47.64    | 8.17  | 47.87 | 441          | -0.552 |
| Ccam02G002983 | <i>CcbHLH029</i> | Chr2 | 66483026 | 66489866 | 44.37    | 4.98  | 62.23 | 398          | -0.493 |
| Ccam02G003003 | <i>CcbHLH030</i> | Chr2 | 66819599 | 66823545 | 38.06    | 7.14  | 65.52 | 343          | -0.494 |
| Ccam02G003014 | <i>CcbHLH031</i> | Chr2 | 67027899 | 67031202 | 37.03    | 5.05  | 58.15 | 327          | -0.455 |
| Ccam02G003024 | <i>CcbHLH032</i> | Chr2 | 67224795 | 67235404 | 33.01    | 4.49  | 70.27 | 292          | -0.621 |
| Ccam02G003029 | <i>CcbHLH033</i> | Chr2 | 67296203 | 67300181 | 40.29    | 7.74  | 57.13 | 364          | -0.409 |
| Ccam02G003063 | <i>CcbHLH034</i> | Chr2 | 67829470 | 67852217 | 85.28    | 6.25  | 51.65 | 760          | -0.535 |
| Ccam02G003130 | <i>CcbHLH035</i> | Chr2 | 68734621 | 68736580 | 37.58    | 4.98  | 42.13 | 337          | -0.605 |
| Ccam02G003212 | <i>CcbHLH036</i> | Chr2 | 69942348 | 69948752 | 58       | 7.63  | 70    | 517          | -0.462 |
| Ccam02G003256 | <i>CcbHLH037</i> | Chr2 | 70642905 | 70644332 | 51.47    | 5.56  | 54.45 | 475          | -0.552 |
| Ccam03G000043 | <i>CcbHLH038</i> | Chr3 | 749033   | 754709   | 28.16    | 5.79  | 55.8  | 256          | -0.68  |
| Ccam03G000529 | <i>CcbHLH039</i> | Chr3 | 7684397  | 7686184  | 25.51    | 9.28  | 49.4  | 228          | -0.434 |
| Ccam03G001506 | <i>CcbHLH040</i> | Chr3 | 25046906 | 25049115 | 29.24    | 6.01  | 72.44 | 261          | -0.484 |
| Ccam03G001581 | <i>CcbHLH041</i> | Chr3 | 26751911 | 26755707 | 63.53    | 6.41  | 55.31 | 584          | -0.719 |
| Ccam03G002509 | <i>CcbHLH042</i> | Chr3 | 62978977 | 62983892 | 48.27    | 8.59  | 58.09 | 438          | -0.617 |

|               |           |      |          |          |       |       |       |     |        |
|---------------|-----------|------|----------|----------|-------|-------|-------|-----|--------|
| Ccam03G002787 | CcbHLH043 | Chr3 | 67684822 | 67686496 | 27.33 | 8.57  | 52.77 | 245 | -0.417 |
| Ccam03G002879 | CcbHLH044 | Chr3 | 69167145 | 69170907 | 37.08 | 5.93  | 59.76 | 327 | -0.435 |
| Ccam03G002889 | CcbHLH045 | Chr3 | 69301087 | 69302520 | 36.53 | 6.86  | 52.05 | 334 | -0.322 |
| Ccam03G002937 | CcbHLH046 | Chr3 | 69983475 | 69984873 | 23.44 | 9.92  | 37.35 | 204 | -0.445 |
| Ccam03G003221 | CcbHLH047 | Chr3 | 74526055 | 74526480 | 15.85 | 9.1   | 86.82 | 141 | -0.634 |
| Ccam04G000139 | CcbHLH048 | Chr4 | 2160052  | 2162481  | 22.73 | 6.56  | 46.73 | 198 | -0.51  |
| Ccam04G000570 | CcbHLH049 | Chr4 | 10374743 | 10380969 | 15.61 | 9.69  | 53.25 | 139 | -0.361 |
| Ccam04G000814 | CcbHLH050 | Chr4 | 18031684 | 18040131 | 30.82 | 9.82  | 47.34 | 276 | -0.587 |
| Ccam04G000873 | CcbHLH051 | Chr4 | 23141882 | 23149892 | 54.32 | 5.21  | 60.59 | 496 | -0.505 |
| Ccam04G001130 | CcbHLH052 | Chr4 | 33259778 | 33265939 | 33.73 | 5.58  | 45.97 | 301 | -0.304 |
| Ccam04G001284 | CcbHLH053 | Chr4 | 36996649 | 37000457 | 41.02 | 6.4   | 53.48 | 375 | -0.543 |
| Ccam04G001648 | CcbHLH054 | Chr4 | 43092283 | 43094476 | 40.39 | 4.74  | 54.53 | 366 | -0.645 |
| Ccam04G001694 | CcbHLH055 | Chr4 | 43680225 | 43686090 | 47.98 | 4.97  | 47.33 | 427 | -0.566 |
| Ccam04G001699 | CcbHLH056 | Chr4 | 43765700 | 43767138 | 43.15 | 4.92  | 58.96 | 383 | -0.607 |
| Ccam04G001717 | CcbHLH057 | Chr4 | 44075981 | 44082942 | 44.11 | 4.66  | 67.78 | 388 | -0.508 |
| Ccam04G001759 | CcbHLH058 | Chr4 | 44628142 | 44631029 | 43.4  | 6.46  | 48.19 | 396 | -0.558 |
| Ccam04G001815 | CcbHLH059 | Chr4 | 45561586 | 45567483 | 29.6  | 5.91  | 56.02 | 276 | -0.657 |
| Ccam04G001837 | CcbHLH060 | Chr4 | 45974680 | 45978002 | 39.88 | 8.68  | 65.99 | 357 | -0.459 |
| Ccam04G001949 | CcbHLH061 | Chr4 | 47535163 | 47539977 | 29.06 | 5.14  | 57.45 | 258 | -0.576 |
| Ccam04G002165 | CcbHLH062 | Chr4 | 51029970 | 51031983 | 40.3  | 4.68  | 58.14 | 366 | -0.645 |
| Ccam04G002172 | CcbHLH063 | Chr4 | 51168043 | 51177534 | 46.97 | 6.26  | 50.47 | 432 | -0.404 |
| Ccam04G002219 | CcbHLH064 | Chr4 | 51851381 | 51855394 | 47.65 | 5.64  | 52.3  | 426 | -0.615 |
| Ccam04G002418 | CcbHLH065 | Chr4 | 55009260 | 55012952 | 27.24 | 6.45  | 57.86 | 240 | -0.572 |
| Ccam04G002640 | CcbHLH066 | Chr4 | 58124582 | 58128376 | 10.12 | 10.73 | 57.71 | 86  | -1.016 |
| Ccam04G002642 | CcbHLH067 | Chr4 | 58148263 | 58156982 | 19.93 | 9.13  | 54.49 | 177 | -0.238 |
| Ccam04G002643 | CcbHLH068 | Chr4 | 58173005 | 58176327 | 19.68 | 9.62  | 50.01 | 177 | -0.229 |
| Ccam04G002644 | CcbHLH069 | Chr4 | 58193811 | 58197262 | 16.05 | 10.16 | 45.67 | 140 | -0.574 |
| Ccam05G000235 | CcbHLH070 | Chr5 | 3652871  | 3653548  | 25.61 | 5.68  | 68.07 | 225 | -0.692 |
| Ccam05G000742 | CcbHLH071 | Chr5 | 11705537 | 11709597 | 25.64 | 5.39  | 59.72 | 230 | -0.724 |
| Ccam05G000818 | CcbHLH072 | Chr5 | 12992133 | 12994591 | 57.14 | 6.52  | 41.2  | 518 | -0.367 |
| Ccam05G000902 | CcbHLH073 | Chr5 | 14968097 | 14976907 | 10.04 | 9.3   | 45.83 | 86  | -0.595 |
| Ccam05G001253 | CcbHLH074 | Chr5 | 24204803 | 24219252 | 60.56 | 6.22  | 52.15 | 551 | -0.822 |
| Ccam05G001269 | CcbHLH075 | Chr5 | 24722566 | 24729289 | 57.68 | 6.61  | 51.95 | 524 | -0.53  |
| Ccam05G002154 | CcbHLH076 | Chr5 | 50150767 | 50152137 | 19.81 | 8.91  | 57.92 | 174 | -0.265 |
| Ccam05G002171 | CcbHLH077 | Chr5 | 50400806 | 50403312 | 40.37 | 5.96  | 47.02 | 361 | -0.594 |
| Ccam05G002316 | CcbHLH078 | Chr5 | 52967352 | 52968339 | 32.4  | 4.53  | 56.33 | 291 | -0.352 |
| Ccam05G002354 | CcbHLH079 | Chr5 | 53433377 | 53440681 | 74.18 | 8.95  | 61.36 | 666 | -0.592 |
| Ccam06G000067 | CcbHLH080 | Chr6 | 1026820  | 1030288  | 58.66 | 6.01  | 47.21 | 545 | -0.59  |
| Ccam06G000318 | CcbHLH081 | Chr6 | 4585577  | 4588891  | 38.82 | 6.77  | 60.27 | 349 | -0.67  |
| Ccam06G000343 | CcbHLH082 | Chr6 | 4990171  | 4995709  | 56.04 | 5.13  | 58.04 | 510 | -0.545 |
| Ccam06G000478 | CcbHLH083 | Chr6 | 7089484  | 7091400  | 70.41 | 5.49  | 49.24 | 638 | -0.578 |
| Ccam06G000723 | CcbHLH084 | Chr6 | 11121128 | 11122582 | 30.44 | 9.51  | 55.4  | 267 | -0.348 |
| Ccam06G000831 | CcbHLH085 | Chr6 | 13424666 | 13428677 | 28.22 | 9.3   | 57.99 | 258 | -0.526 |
| Ccam06G000990 | CcbHLH086 | Chr6 | 17311514 | 17312035 | 19.76 | 11.98 | 70.48 | 173 | -0.639 |
| Ccam06G001416 | CcbHLH087 | Chr6 | 36923970 | 36936953 | 57.1  | 9.02  | 63.28 | 502 | -0.736 |
| Ccam06G001588 | CcbHLH088 | Chr6 | 41635869 | 41639829 | 45.07 | 5.88  | 67.23 | 397 | -0.651 |
| Ccam06G001856 | CcbHLH089 | Chr6 | 46323071 | 46326641 | 45.71 | 5.95  | 54.2  | 426 | -0.528 |

|               |           |       |          |          |        |       |       |      |        |
|---------------|-----------|-------|----------|----------|--------|-------|-------|------|--------|
| Ccam06G002000 | CcbHLH090 | Chr6  | 48263853 | 48265844 | 72.27  | 5.57  | 51.28 | 663  | -0.459 |
| Ccam06G002056 | CcbHLH091 | Chr6  | 49116076 | 49132754 | 136.68 | 5.16  | 49.5  | 1216 | -0.357 |
| Ccam07G000028 | CcbHLH092 | Chr7  | 431402   | 434395   | 39.53  | 6.31  | 48.09 | 361  | -0.478 |
| Ccam07G000323 | CcbHLH093 | Chr7  | 4121727  | 4124512  | 44.13  | 6.36  | 61.21 | 394  | -0.528 |
| Ccam07G000447 | CcbHLH094 | Chr7  | 5803846  | 5804952  | 30.68  | 5.83  | 65.81 | 270  | -0.393 |
| Ccam07G000451 | CcbHLH095 | Chr7  | 5895892  | 5898635  | 51.95  | 5.07  | 49.19 | 460  | -0.634 |
| Ccam07G000467 | CcbHLH096 | Chr7  | 6102541  | 6106923  | 28.65  | 6.48  | 52.78 | 252  | -0.451 |
| Ccam07G000806 | CcbHLH097 | Chr7  | 11479838 | 11480413 | 21.08  | 11.56 | 59.47 | 191  | -0.592 |
| Ccam07G000817 | CcbHLH098 | Chr7  | 11591427 | 11592415 | 32.07  | 4.52  | 51.56 | 291  | -0.213 |
| Ccam07G001012 | CcbHLH099 | Chr7  | 14652722 | 14654152 | 52.48  | 6.49  | 48.9  | 476  | -0.44  |
| Ccam07G001054 | CcbHLH100 | Chr7  | 15380875 | 15387822 | 33.22  | 6.2   | 45.53 | 309  | -0.464 |
| Ccam07G001230 | CcbHLH101 | Chr7  | 20042699 | 20048742 | 41.71  | 7.7   | 77.62 | 376  | -0.696 |
| Ccam07G001915 | CcbHLH102 | Chr7  | 41541957 | 41545734 | 51.87  | 5.2   | 58.1  | 470  | -0.636 |
| Ccam08G000150 | CcbHLH103 | Chr8  | 2021192  | 2023735  | 35.27  | 5.52  | 66.09 | 315  | -0.397 |
| Ccam08G000297 | CcbHLH104 | Chr8  | 4195816  | 4196490  | 24.67  | 9.44  | 68.27 | 224  | -0.274 |
| Ccam08G000718 | CcbHLH105 | Chr8  | 9947275  | 9951445  | 25.55  | 5.89  | 48.8  | 230  | -0.712 |
| Ccam08G000756 | CcbHLH106 | Chr8  | 10673989 | 10677802 | 57.11  | 6.08  | 45.46 | 515  | -0.721 |
| Ccam08G001312 | CcbHLH107 | Chr8  | 29828625 | 29832062 | 50.93  | 5.83  | 51.27 | 458  | -0.607 |
| Ccam08G001540 | CcbHLH108 | Chr8  | 38759329 | 38766429 | 50.3   | 9.46  | 64.38 | 471  | -0.499 |
| Ccam08G001944 | CcbHLH109 | Chr8  | 45985682 | 45992717 | 30.49  | 6.1   | 39.99 | 268  | -0.507 |
| Ccam09G000043 | CcbHLH110 | Chr9  | 706970   | 707701   | 10.04  | 5.88  | 74.67 | 87   | -0.594 |
| Ccam09G000250 | CcbHLH111 | Chr9  | 3585075  | 3588902  | 55.65  | 5.71  | 42.34 | 505  | -0.722 |
| Ccam09G000335 | CcbHLH112 | Chr9  | 4652432  | 4655289  | 25.29  | 6.65  | 66.18 | 230  | -0.498 |
| Ccam09G000592 | CcbHLH113 | Chr9  | 8580278  | 8580967  | 25.19  | 9.03  | 58.02 | 229  | -0.357 |
| Ccam09G000671 | CcbHLH114 | Chr9  | 9896073  | 9899839  | 25.59  | 8.94  | 62.82 | 237  | -0.416 |
| Ccam09G000703 | CcbHLH115 | Chr9  | 10536836 | 10539736 | 35.31  | 5.65  | 66.43 | 316  | -0.465 |
| Ccam09G000849 | CcbHLH116 | Chr9  | 13089738 | 13094994 | 69.72  | 5.8   | 41.12 | 623  | -0.729 |
| Ccam09G000924 | CcbHLH117 | Chr9  | 15046577 | 15062881 | 37.96  | 7.17  | 64.56 | 337  | -0.73  |
| Ccam09G001546 | CcbHLH118 | Chr9  | 35440630 | 35452345 | 71.92  | 5.6   | 59.33 | 637  | -0.478 |
| Ccam09G001725 | CcbHLH119 | Chr9  | 38936890 | 38949677 | 85.06  | 6.59  | 43.44 | 767  | -0.237 |
| Ccam09G001727 | CcbHLH120 | Chr9  | 38978854 | 38987346 | 23.93  | 7.63  | 58.35 | 213  | -0.657 |
| Ccam10G000132 | CcbHLH121 | Chr10 | 5335120  | 5337964  | 73.04  | 6.39  | 45.55 | 655  | -0.475 |
| Ccam10G000299 | CcbHLH122 | Chr10 | 10557053 | 10558250 | 34.94  | 5.83  | 71.42 | 317  | -0.524 |
| Ccam10G000671 | CcbHLH123 | Chr10 | 27257982 | 27258932 | 35.07  | 6.98  | 69.54 | 316  | -0.349 |
| Ccam10G001192 | CcbHLH124 | Chr10 | 38491382 | 38506471 | 94.85  | 6.42  | 46.69 | 835  | -0.413 |
| Ccam10G001273 | CcbHLH125 | Chr10 | 39898384 | 39904911 | 38.25  | 7.67  | 56.42 | 330  | -0.352 |
| Ccam10G001274 | CcbHLH126 | Chr10 | 39913908 | 39915861 | 19.82  | 8.88  | 52.59 | 175  | -0.549 |
| Ccam10G001275 | CcbHLH127 | Chr10 | 39934360 | 39935396 | 20.05  | 6.32  | 52.68 | 179  | -0.234 |
| Ccam10G001276 | CcbHLH128 | Chr10 | 39958796 | 39960585 | 19.86  | 8.89  | 46.94 | 176  | -0.407 |
| Ccam10G001702 | CcbHLH129 | Chr10 | 46143234 | 46143767 | 19.98  | 11.5  | 69.67 | 177  | -0.51  |
| Ccam10G001809 | CcbHLH130 | Chr10 | 47900999 | 47907411 | 77.19  | 6.99  | 61.32 | 717  | -0.569 |
| Ccam11G000202 | CcbHLH131 | Chr11 | 3196939  | 3210105  | 36.36  | 8.62  | 57.01 | 340  | -0.298 |
| Ccam11G000280 | CcbHLH132 | Chr11 | 4276260  | 4287243  | 29.23  | 6.25  | 57.54 | 261  | -0.333 |
| Ccam11G000711 | CcbHLH133 | Chr11 | 10293608 | 10294685 | 30.84  | 7.8   | 63.38 | 279  | -0.661 |
| Ccam11G000722 | CcbHLH134 | Chr11 | 10485433 | 10499537 | 79.31  | 5.19  | 61.61 | 709  | -0.553 |
| Ccam11G000731 | CcbHLH135 | Chr11 | 10601999 | 10610427 | 31.01  | 6.45  | 43.83 | 288  | -0.246 |
| Ccam11G000873 | CcbHLH136 | Chr11 | 12886573 | 12887142 | 21.07  | 11.68 | 69.85 | 189  | -0.539 |
| Ccam11G000993 | CcbHLH137 | Chr11 | 15174399 | 15181628 | 75.55  | 5.38  | 62.2  | 694  | -0.537 |

|               |                  |       |          |          |       |       |       |     |        |
|---------------|------------------|-------|----------|----------|-------|-------|-------|-----|--------|
| Ccam11G001086 | <i>CcbHLH138</i> | Chr11 | 17412365 | 17420289 | 17.15 | 8.49  | 69.89 | 154 | -0.356 |
| Ccam11G001256 | <i>CcbHLH139</i> | Chr11 | 23687415 | 23696231 | 58.36 | 5.65  | 49.58 | 537 | -0.516 |
| Ccam11G001278 | <i>CcbHLH140</i> | Chr11 | 24739058 | 24757487 | 49.24 | 6.5   | 52.07 | 438 | -0.774 |
| Ccam11G001488 | <i>CcbHLH141</i> | Chr11 | 32381697 | 32385249 | 30.65 | 7.01  | 47.24 | 271 | -0.672 |
| Ccam11G001570 | <i>CcbHLH142</i> | Chr11 | 34521875 | 34525282 | 38.92 | 5.14  | 62.96 | 345 | -0.429 |
| Ccam11G001635 | <i>CcbHLH143</i> | Chr11 | 35920277 | 35921258 | 20.69 | 9.21  | 40.32 | 188 | -0.188 |
| Ccam12G000639 | <i>CcbHLH144</i> | Chr12 | 25049881 | 25055267 | 16.09 | 9.12  | 46.58 | 144 | -0.394 |
| Ccam12G001023 | <i>CcbHLH145</i> | Chr12 | 31336613 | 31338433 | 67.49 | 6.61  | 50.83 | 606 | -0.626 |
| Ccam12G001109 | <i>CcbHLH146</i> | Chr12 | 32507942 | 32511726 | 27.45 | 9.22  | 48.55 | 253 | -0.287 |
| Ccam12G001241 | <i>CcbHLH147</i> | Chr12 | 34739168 | 34744112 | 22.07 | 5.77  | 42.79 | 191 | -0.512 |
| Ccam12G001317 | <i>CcbHLH148</i> | Chr12 | 35723320 | 35729368 | 38.85 | 6.22  | 38.14 | 355 | -0.385 |
| Ccam12G001327 | <i>CcbHLH149</i> | Chr12 | 35840899 | 35841549 | 23.75 | 10.76 | 61.57 | 216 | -0.854 |
| Ccam12G001429 | <i>CcbHLH150</i> | Chr12 | 37399389 | 37407382 | 58.97 | 6.45  | 68.6  | 543 | -0.641 |

---



**Table S2.** *Ka/Ks* analysis for the *CcbHLH* duplicated genes

| <b>Gene 1</b>    | <b>Gene 2</b>    | <b><i>Ka</i></b> | <b><i>Ks</i></b> | <b><i>Ka/Ks</i></b> |
|------------------|------------------|------------------|------------------|---------------------|
| <i>CcbHLH006</i> | <i>CcbHLH012</i> | 0.23500594       | 0.56723065       | 0.41430402          |
| <i>CcbHLH002</i> | <i>CcbHLH009</i> | 0.09650949       | 0.53162888       | 0.18153545          |
| <i>CcbHLH012</i> | <i>CcbHLH028</i> | 0.23161595       | 0.90192113       | 0.25680288          |
| <i>CcbHLH005</i> | <i>CcbHLH027</i> | 0.22687007       | 1.21865652       | 0.18616408          |
| <i>CcbHLH006</i> | <i>CcbHLH028</i> | 0.2912156        | 1.03800312       | 0.28055368          |
| <i>CcbHLH004</i> | <i>CcbHLH036</i> | 0.43123806       | 1.09600964       | 0.39346192          |
| <i>CcbHLH013</i> | <i>CcbHLH033</i> | 0.15423131       | 1.00849939       | 0.15293149          |
| <i>CcbHLH014</i> | <i>CcbHLH031</i> | 0.20814526       | 0.99791194       | 0.20858079          |
| <i>CcbHLH009</i> | <i>CcbHLH030</i> | 0.16915638       | 0.99205835       | 0.17051052          |
| <i>CcbHLH010</i> | <i>CcbHLH029</i> | 0.38297336       | 1.77625963       | 0.21560663          |
| <i>CcbHLH015</i> | <i>CcbHLH041</i> | 0.14582277       | 0.66203978       | 0.22026285          |
| <i>CcbHLH013</i> | <i>CcbHLH055</i> | 0.2576983        | 1.09422297       | 0.23550803          |
| <i>CcbHLH014</i> | <i>CcbHLH056</i> | 0.26705575       | 0.92543063       | 0.28857458          |
| <i>CcbHLH010</i> | <i>CcbHLH057</i> | 0.33811513       | 2.40143596       | 0.14079706          |
| <i>CcbHLH012</i> | <i>CcbHLH058</i> | 0.28996781       | 1.00308454       | 0.28907614          |
| <i>CcbHLH004</i> | <i>CcbHLH060</i> | 0.49692138       | 1.49153868       | 0.33316023          |
| <i>CcbHLH005</i> | <i>CcbHLH059</i> | 0.20790203       | 1.09573195       | 0.18973803          |
| <i>CcbHLH006</i> | <i>CcbHLH058</i> | 0.37377526       | 0.98921461       | 0.37785052          |
| <i>CcbHLH015</i> | <i>CcbHLH080</i> | 0.2881872        | 1.1969836        | 0.2407612           |
| <i>CcbHLH124</i> | <i>CcbHLH141</i> | 0.19307342       | 0.56219989       | 0.34342487          |
| <i>CcbHLH130</i> | <i>CcbHLH137</i> | 0.34339487       | 0.86978599       | 0.39480386          |
| <i>CcbHLH121</i> | <i>CcbHLH145</i> | 0.22246819       | 1.54343184       | 0.14413865          |
| <i>CcbHLH129</i> | <i>CcbHLH020</i> | 0.55057496       | 0.97843313       | 0.56271087          |
| <i>CcbHLH124</i> | <i>CcbHLH065</i> | 0.3193442        | 0.93567611       | 0.3412978           |
| <i>CcbHLH125</i> | <i>CcbHLH076</i> | 0.35316091       | 1.02480974       | 0.34461119          |
| <i>CcbHLH136</i> | <i>CcbHLH020</i> | 0.31479403       | 0.60833056       | 0.51747201          |
| <i>CcbHLH133</i> | <i>CcbHLH023</i> | 0.13870709       | 1.19265491       | 0.11630111          |
| <i>CcbHLH134</i> | <i>CcbHLH022</i> | 0.13480412       | 0.73825633       | 0.18259798          |
| <i>CcbHLH142</i> | <i>CcbHLH021</i> | 0.39343451       | NaN              | NaN                 |
| <i>CcbHLH147</i> | <i>CcbHLH048</i> | 0.2723147        | 0.66388264       | 0.410185            |
| <i>CcbHLH144</i> | <i>CcbHLH049</i> | 0.11342323       | 0.33214852       | 0.34148346          |
| <i>CcbHLH146</i> | <i>CcbHLH085</i> | 0.20134274       | 0.84434473       | 0.23846035          |
| <i>CcbHLH149</i> | <i>CcbHLH097</i> | 0.25639202       | 1.081268         | 0.23712162          |
| <i>CcbHLH036</i> | <i>CcbHLH060</i> | 0.28441144       | 0.78938396       | 0.36029544          |
| <i>CcbHLH018</i> | <i>CcbHLH061</i> | 0.0946908        | 0.92676891       | 0.10217304          |
| <i>CcbHLH035</i> | <i>CcbHLH062</i> | 0.2844935        | 1.0391253        | 0.27378171          |
| <i>CcbHLH028</i> | <i>CcbHLH058</i> | 0.19332767       | 0.5454234        | 0.35445431          |
| <i>CcbHLH029</i> | <i>CcbHLH057</i> | 0.24306257       | 1.06282946       | 0.22869386          |
| <i>CcbHLH031</i> | <i>CcbHLH056</i> | 0.14505191       | 0.60707306       | 0.2389365           |
| <i>CcbHLH033</i> | <i>CcbHLH055</i> | 0.17399405       | 0.52762175       | 0.32977042          |
| <i>CcbHLH035</i> | <i>CcbHLH054</i> | 0.21162088       | 0.5236623        | 0.40411709          |
| <i>CcbHLH027</i> | <i>CcbHLH059</i> | 0.10967151       | 0.65211763       | 0.16817749          |
| <i>CcbHLH025</i> | <i>CcbHLH075</i> | 0.25656472       | 1.28565633       | 0.19955933          |
| <i>CcbHLH019</i> | <i>CcbHLH108</i> | 0.22802884       | 1.25993903       | 0.18098402          |
| <i>CcbHLH018</i> | <i>CcbHLH109</i> | 0.1809742        | 1.48210876       | 0.12210589          |

|                  |                  |            |            |            |
|------------------|------------------|------------|------------|------------|
| <i>CcbHLH046</i> | <i>CcbHLH091</i> | 0.27897029 | 0.59128009 | 0.47180735 |
| <i>CcbHLH041</i> | <i>CcbHLH080</i> | 0.31119593 | 1.35568182 | 0.22954939 |
| <i>CcbHLH042</i> | <i>CcbHLH089</i> | 0.22552335 | 1.01431536 | 0.22234047 |
| <i>CcbHLH043</i> | <i>CcbHLH087</i> | 0.31231048 | 0.60175985 | 0.51899521 |
| <i>CcbHLH045</i> | <i>CcbHLH083</i> | 0.24097958 | 1.86002761 | 0.12955699 |
| <i>CcbHLH043</i> | <i>CcbHLH084</i> | 0.38745744 | 1.3295763  | 0.29141422 |
| <i>CcbHLH043</i> | <i>CcbHLH094</i> | 0.40882631 | 1.29716464 | 0.31516917 |
| <i>CcbHLH042</i> | <i>CcbHLH092</i> | 0.37206841 | 1.07957782 | 0.34464251 |
| <i>CcbHLH054</i> | <i>CcbHLH062</i> | 0.3124337  | 1.12521329 | 0.27766621 |
| <i>CcbHLH066</i> | <i>CcbHLH076</i> | 0.43918893 | 1.02554581 | 0.42824896 |
| <i>CcbHLH061</i> | <i>CcbHLH109</i> | 0.19268281 | 1.21905132 | 0.15805964 |
| <i>CcbHLH079</i> | <i>CcbHLH101</i> | 0.2689257  | 0.87679004 | 0.30671619 |
| <i>CcbHLH070</i> | <i>CcbHLH112</i> | 0.23062034 | 0.99176992 | 0.23253412 |
| <i>CcbHLH084</i> | <i>CcbHLH087</i> | 0.40971009 | 1.55493882 | 0.26348952 |
| <i>CcbHLH083</i> | <i>CcbHLH090</i> | 0.19559434 | 2.25026251 | 0.08692068 |
| <i>CcbHLH089</i> | <i>CcbHLH097</i> | 0.32556689 | 1.18533778 | 0.2746617  |
| <i>CcbHLH086</i> | <i>CcbHLH097</i> | 0.22386974 | 0.91366332 | 0.24502433 |
| <i>CcbHLH084</i> | <i>CcbHLH094</i> | 0.20458273 | 0.83138502 | 0.24607459 |
| <i>CcbHLH088</i> | <i>CcbHLH093</i> | 0.23119709 | 1.19762384 | 0.1930465  |
| <i>CcbHLH087</i> | <i>CcbHLH094</i> | 0.44120148 | 1.24104851 | 0.35550704 |
| <i>CcbHLH103</i> | <i>CcbHLH115</i> | 0.19215012 | 1.16337865 | 0.16516559 |
| <i>CcbHLH106</i> | <i>CcbHLH111</i> | 0.2237209  | 0.93037417 | 0.24046336 |
| <i>CcbHLH104</i> | <i>CcbHLH113</i> | 0.17660531 | 1.28236727 | 0.1377182  |

---



**Table S3.** *Ka/Ks* analysis for the *CcbHLH* and *Arabidopsis* homologous genes

| <b>Cc-Gene</b>   | <b>At-Gene</b>     | <b><i>Ka</i></b> | <b><i>Ks</i></b> | <b><i>Ka/Ks</i></b> |
|------------------|--------------------|------------------|------------------|---------------------|
| <i>CcbHLH001</i> | <i>AT1G63650.3</i> | 0.391063         | NaN              | NaN                 |
| <i>CcbHLH002</i> | <i>AT1G51140.1</i> | 0.563993         | 1.832166         | 0.307829            |
| <i>CcbHLH003</i> | <i>AT1G51140.1</i> | 0.540895         | 3.011273         | 0.179623            |
| <i>CcbHLH006</i> | <i>AT1G09530.1</i> | 0.517115         | 1.834967         | 0.281812            |
| <i>CcbHLH006</i> | <i>AT1G09250.1</i> | 0.541174         | 2.140016         | 0.252883            |
| <i>CcbHLH009</i> | <i>AT1G09530.1</i> | 0.549182         | NaN              | NaN                 |
| <i>CcbHLH011</i> | <i>AT1G51140.1</i> | 0.535489         | NaN              | NaN                 |
| <i>CcbHLH011</i> | <i>AT1G27740.1</i> | 0.542542         | NaN              | NaN                 |
| <i>CcbHLH012</i> | <i>AT1G30670.1</i> | 0.589955         | NaN              | NaN                 |
| <i>CcbHLH012</i> | <i>AT1G68920.4</i> | 0.429324         | 2.441618         | 0.175836            |
| <i>CcbHLH013</i> | <i>AT1G69010.1</i> | 0.372544         | 3.1349           | 0.118838            |
| <i>CcbHLH013</i> | <i>AT1G12860.1</i> | 0.256552         | NaN              | NaN                 |
| <i>CcbHLH014</i> | <i>AT1G22490.2</i> | 0.42085          | NaN              | NaN                 |
| <i>CcbHLH015</i> | <i>AT1G22490.2</i> | 0.371546         | NaN              | NaN                 |
| <i>CcbHLH016</i> | <i>AT2G20100.3</i> | 0.325067         | 2.473899         | 0.131399            |
| <i>CcbHLH018</i> | <i>AT2G42280.3</i> | 0.431623         | NaN              | NaN                 |
| <i>CcbHLH018</i> | <i>AT2G42300.1</i> | 0.392556         | 1.99918          | 0.196358            |
| <i>CcbHLH019</i> | <i>AT2G20100.3</i> | 0.355311         | 1.670253         | 0.212729            |
| <i>CcbHLH020</i> | <i>AT2G22750.3</i> | 0.451086         | 2.321151         | 0.194337            |
| <i>CcbHLH021</i> | <i>AT2G42280.3</i> | 0.458652         | NaN              | NaN                 |
| <i>CcbHLH028</i> | <i>AT2G46970.1</i> | 0.650137         | NaN              | NaN                 |
| <i>CcbHLH031</i> | <i>AT2G22750.3</i> | 0.384004         | NaN              | NaN                 |
| <i>CcbHLH033</i> | <i>AT2G40200.1</i> | 0.57685          | NaN              | NaN                 |
| <i>CcbHLH033</i> | <i>AT2G18300.3</i> | 0.53332          | 2.636851         | 0.202256            |
| <i>CcbHLH035</i> | <i>AT2G42280.3</i> | 0.552264         | 2.426988         | 0.227551            |
| <i>CcbHLH038</i> | <i>AT2G22750.3</i> | 0.505538         | NaN              | NaN                 |
| <i>CcbHLH039</i> | <i>AT2G14760.3</i> | 0.510834         | NaN              | NaN                 |
| <i>CcbHLH041</i> | <i>AT2G46810.1</i> | 0.434613         | NaN              | NaN                 |
| <i>CcbHLH041</i> | <i>AT2G46810.1</i> | 0.457829         | NaN              | NaN                 |
| <i>CcbHLH044</i> | <i>AT2G24260.1</i> | 0.345029         | NaN              | NaN                 |
| <i>CcbHLH045</i> | <i>AT3G57800.1</i> | 0.412166         | 3.618364         | 0.113909            |
| <i>CcbHLH045</i> | <i>AT3G56770.1</i> | 0.391504         | NaN              | NaN                 |
| <i>CcbHLH047</i> | <i>AT3G07340.1</i> | 0.429965         | NaN              | NaN                 |
| <i>CcbHLH054</i> | <i>AT3G21330.1</i> | 0.410367         | 3.024519         | 0.13568             |
| <i>CcbHLH055</i> | <i>AT3G62090.2</i> | 0.711208         | 1.759927         | 0.404112            |
| <i>CcbHLH055</i> | <i>AT3G06590.2</i> | 0.484142         | 2.0847           | 0.232236            |
| <i>CcbHLH056</i> | <i>AT3G05800.1</i> | 0.501939         | 1.380459         | 0.363603            |
| <i>CcbHLH058</i> | <i>AT3G62090.2</i> | 0.668809         | 3.29868          | 0.202751            |
| <i>CcbHLH064</i> | <i>AT3G06590.2</i> | 0.44609          | 2.631417         | 0.169525            |
| <i>CcbHLH064</i> | <i>AT3G06590.2</i> | 0.797705         | NaN              | NaN                 |
| <i>CcbHLH064</i> | <i>AT3G06120.1</i> | 0.179717         | NaN              | NaN                 |
| <i>CcbHLH074</i> | <i>AT3G47640.2</i> | 0.475342         | 2.057972         | 0.230976            |
| <i>CcbHLH075</i> | <i>AT3G07340.1</i> | 0.422495         | 3.631451         | 0.116343            |
| <i>CcbHLH078</i> | <i>AT3G07340.1</i> | 0.467619         | 3.647439         | 0.128205            |
| <i>CcbHLH080</i> | <i>AT3G19860.2</i> | 0.587352         | NaN              | NaN                 |

|                  |                    |          |          |          |
|------------------|--------------------|----------|----------|----------|
| <i>CcbHLH081</i> | <i>AT3G23210.1</i> | 0.35224  | NaN      | NaN      |
| <i>CcbHLH082</i> | <i>AT4G37850.2</i> | 0.437359 | 4.531136 | 0.096523 |
| <i>CcbHLH083</i> | <i>AT4G30980.2</i> | 0.360209 | 1.577439 | 0.22835  |
| <i>CcbHLH083</i> | <i>AT4G37850.2</i> | 0.403583 | NaN      | NaN      |
| <i>CcbHLH088</i> | <i>AT4G29930.3</i> | 0.440754 | 1.992078 | 0.221253 |
| <i>CcbHLH089</i> | <i>AT4G17880.1</i> | 0.314076 | NaN      | NaN      |
| <i>CcbHLH090</i> | <i>AT4G37850.2</i> | 0.470054 | NaN      | NaN      |
| <i>CcbHLH093</i> | <i>AT4G36540.1</i> | 0.529271 | NaN      | NaN      |
| <i>CcbHLH093</i> | <i>AT4G34530.1</i> | 0.404877 | NaN      | NaN      |
| <i>CcbHLH103</i> | <i>AT4G17880.1</i> | 0.287119 | NaN      | NaN      |
| <i>CcbHLH103</i> | <i>AT4G00050.1</i> | 0.33448  | NaN      | NaN      |
| <i>CcbHLH105</i> | <i>AT4G01460.1</i> | 0.425626 | NaN      | NaN      |
| <i>CcbHLH108</i> | <i>AT4G29930.3</i> | 0.387341 | NaN      | NaN      |
| <i>CcbHLH108</i> | <i>AT4G30980.2</i> | 0.438548 | 2.920475 | 0.150163 |
| <i>CcbHLH108</i> | <i>AT4G36060.3</i> | 0.454389 | 2.203012 | 0.206258 |
| <i>CcbHLH109</i> | <i>AT5G65640.1</i> | 0.377721 | NaN      | NaN      |
| <i>CcbHLH109</i> | <i>AT5G53210.1</i> | 0.36693  | NaN      | NaN      |
| <i>CcbHLH115</i> | <i>AT5G65640.1</i> | 0.351049 | NaN      | NaN      |
| <i>CcbHLH115</i> | <i>AT5G57150.4</i> | 0.292013 | NaN      | NaN      |
| <i>CcbHLH117</i> | <i>AT5G46690.1</i> | 0.464377 | NaN      | NaN      |
| <i>CcbHLH120</i> | <i>AT5G46760.1</i> | 0.349691 | NaN      | NaN      |
| <i>CcbHLH122</i> | <i>AT5G48560.1</i> | 0.462513 | NaN      | NaN      |
| <i>CcbHLH129</i> | <i>AT5G01305.1</i> | 0.47317  | 2.202158 | 0.214866 |
| <i>CcbHLH129</i> | <i>AT5G65640.1</i> | 0.395514 | NaN      | NaN      |
| <i>CcbHLH130</i> | <i>AT5G50915.2</i> | 0.418551 | 2.172984 | 0.192616 |
| <i>CcbHLH130</i> | <i>AT5G46760.1</i> | 0.381627 | NaN      | NaN      |
| <i>CcbHLH136</i> | <i>AT5G46760.1</i> | 0.357134 | NaN      | NaN      |
| <i>CcbHLH136</i> | <i>AT5G65320.1</i> | 0.481187 | 3.750768 | 0.12829  |
| <i>CcbHLH137</i> | <i>AT5G57150.4</i> | 0.358213 | 2.6933   | 0.133001 |
| <i>CcbHLH137</i> | <i>AT5G58010.1</i> | 0.341824 | NaN      | NaN      |
| <i>CcbHLH137</i> | <i>AT5G65320.1</i> | 0.490928 | NaN      | NaN      |

---

**Table S4.** *Ka/Ks* analysis for the *CcbHLH* and *Populus trichocarpa* homologous genes

| Cc-Gene          | Pt-Gene         | <i>Ka</i> | <i>Ks</i> | <i>Ka/Ks</i> |
|------------------|-----------------|-----------|-----------|--------------|
| <i>CcbHLH001</i> | <i>PNT53769</i> | 0.291132  | 1.621532  | 0.179542     |
| <i>CcbHLH001</i> | <i>PNT45271</i> | 0.298627  | 1.57945   | 0.18907      |
| <i>CcbHLH002</i> | <i>PNT55309</i> | 0.267573  | 1.050313  | 0.254755     |
| <i>CcbHLH002</i> | <i>PNS93365</i> | 0.189214  | 0.964579  | 0.196162     |
| <i>CcbHLH002</i> | <i>PNT43742</i> | 0.266849  | 1.013661  | 0.263253     |
| <i>CcbHLH005</i> | <i>PNT09940</i> | 0.283679  | 1.247406  | 0.227415     |
| <i>CcbHLH005</i> | <i>PNT00810</i> | 0.301142  | 1.264235  | 0.238201     |
| <i>CcbHLH006</i> | <i>PNT56888</i> | 0.421446  | 1.414877  | 0.297868     |
| <i>CcbHLH006</i> | <i>PNT52177</i> | 0.478165  | 2.150896  | 0.22231      |
| <i>CcbHLH006</i> | <i>PNS97934</i> | 0.426303  | 1.830828  | 0.232847     |
| <i>CcbHLH006</i> | <i>PNT46705</i> | 0.408868  | 1.529488  | 0.267323     |
| <i>CcbHLH006</i> | <i>PNT29960</i> | 0.469848  | 1.833703  | 0.256229     |
| <i>CcbHLH006</i> | <i>PNT19953</i> | 0.395673  | 1.229559  | 0.321801     |
| <i>CcbHLH009</i> | <i>PNT55309</i> | 0.238091  | 1.103139  | 0.21583      |
| <i>CcbHLH009</i> | <i>PNS93365</i> | 0.158024  | 1.479539  | 0.106806     |
| <i>CcbHLH009</i> | <i>PNT43742</i> | 0.247256  | 1.154567  | 0.214154     |
| <i>CcbHLH011</i> | <i>PNS97943</i> | 0.340029  | NaN       | NaN          |
| <i>CcbHLH011</i> | <i>PNT29941</i> | 0.331243  | NaN       | NaN          |
| <i>CcbHLH012</i> | <i>PNT56888</i> | 0.408461  | 1.487999  | 0.274504     |
| <i>CcbHLH012</i> | <i>PNT52177</i> | 0.604137  | 2.494412  | 0.242196     |
| <i>CcbHLH012</i> | <i>PNS97934</i> | 0.392812  | 1.962809  | 0.200128     |
| <i>CcbHLH012</i> | <i>PNT46705</i> | 0.428952  | 1.987042  | 0.215874     |
| <i>CcbHLH012</i> | <i>PNT29960</i> | 0.364822  | 1.703151  | 0.214204     |
| <i>CcbHLH012</i> | <i>PNT19953</i> | 0.389085  | 1.228614  | 0.316686     |
| <i>CcbHLH013</i> | <i>PNT57202</i> | 0.295426  | 1.443511  | 0.204658     |
| <i>CcbHLH013</i> | <i>PNT20268</i> | 0.30944   | 1.614281  | 0.191689     |
| <i>CcbHLH014</i> | <i>PNT49059</i> | 0.299553  | 1.430028  | 0.209473     |
| <i>CcbHLH015</i> | <i>PNT51556</i> | 0.366357  | 2.119312  | 0.172866     |
| <i>CcbHLH017</i> | <i>PNT16275</i> | 0.201451  | 4.75474   | 0.042368     |
| <i>CcbHLH017</i> | <i>PNT24092</i> | 0.204581  | NaN       | NaN          |
| <i>CcbHLH018</i> | <i>PNS94332</i> | 0.355049  | 2.206933  | 0.160879     |
| <i>CcbHLH018</i> | <i>PNT30298</i> | 0.379458  | 1.695581  | 0.223792     |
| <i>CcbHLH020</i> | <i>PNT16564</i> | 0.729359  | NaN       | NaN          |
| <i>CcbHLH020</i> | <i>PNT06006</i> | 0.673065  | 2.103191  | 0.320021     |
| <i>CcbHLH020</i> | <i>PNT23859</i> | 0.636333  | NaN       | NaN          |
| <i>CcbHLH021</i> | <i>PNT34804</i> | 0.549917  | NaN       | NaN          |
| <i>CcbHLH021</i> | <i>PNT25815</i> | 0.0763    | 1.246864  | 0.061193     |
| <i>CcbHLH022</i> | <i>PNT47962</i> | 0.273473  | NaN       | NaN          |
| <i>CcbHLH022</i> | <i>PNT37824</i> | 0.261348  | NaN       | NaN          |
| <i>CcbHLH024</i> | <i>PNT22856</i> | 0.526702  | 1.904001  | 0.276629     |
| <i>CcbHLH025</i> | <i>PNT16364</i> | 0.281808  | 1.313722  | 0.214511     |
| <i>CcbHLH025</i> | <i>PNT24052</i> | 0.310445  | 1.369726  | 0.226648     |
| <i>CcbHLH026</i> | <i>PNT02672</i> | 0.504749  | NaN       | NaN          |
| <i>CcbHLH026</i> | <i>PNT49342</i> | 0.513808  | 1.993562  | 0.257733     |
| <i>CcbHLH026</i> | <i>PNT36648</i> | 0.664318  | 2.41816   | 0.27472      |

|           |          |          |          |          |
|-----------|----------|----------|----------|----------|
| CcbHLH027 | PNT00810 | 0.285788 | 1.407075 | 0.203108 |
| CcbHLH028 | PNT56888 | 0.337779 | 2.558617 | 0.132016 |
| CcbHLH028 | PNT52177 | 0.530757 | 1.559457 | 0.340347 |
| CcbHLH028 | PNS97934 | 0.375131 | 1.78794  | 0.209812 |
| CcbHLH028 | PNT46705 | 0.369289 | 1.795749 | 0.205646 |
| CcbHLH028 | PNT29960 | 0.340489 | 1.700201 | 0.200264 |
| CcbHLH028 | PNT19953 | 0.309033 | 2.183737 | 0.141515 |
| CcbHLH031 | PNT49059 | 0.233542 | 1.561492 | 0.149563 |
| CcbHLH031 | PNT26394 | 0.756511 | 5.746851 | 0.131639 |
| CcbHLH033 | PNT57202 | 0.273492 | 1.254739 | 0.217968 |
| CcbHLH033 | PNT26361 | 0.342218 | 1.71538  | 0.1995   |
| CcbHLH033 | PNT20268 | 0.277505 | 1.873849 | 0.148093 |
| CcbHLH034 | PNT57214 | 0.196616 | 1.561241 | 0.125935 |
| CcbHLH034 | PNT49193 | 0.39682  | 1.550069 | 0.256001 |
| CcbHLH035 | PNT02498 | 0.465504 | 3.001594 | 0.155086 |
| CcbHLH035 | PNT49259 | 0.392786 | 2.130418 | 0.184371 |
| CcbHLH035 | PNT20403 | 0.384496 | 2.031636 | 0.189255 |
| CcbHLH036 | PNT31782 | 0.581434 | 2.336778 | 0.248819 |
| CcbHLH039 | PNT17336 | 0.386039 | 1.81905  | 0.21222  |
| CcbHLH039 | PNT23239 | 0.372316 | 1.631823 | 0.228159 |
| CcbHLH041 | PNT51556 | 0.32612  | NaN      | NaN      |
| CcbHLH042 | PNT49677 | 0.316156 | 1.437056 | 0.220002 |
| CcbHLH043 | PNT54427 | 0.288898 | 1.581717 | 0.182648 |
| CcbHLH043 | PNT44582 | 0.305508 | 1.515289 | 0.201617 |
| CcbHLH045 | PNT54440 | 0.297376 | NaN      | NaN      |
| CcbHLH045 | PNT44564 | 0.280744 | NaN      | NaN      |
| CcbHLH047 | PNS99213 | 0.333148 | 2.305331 | 0.144512 |
| CcbHLH047 | PNT30843 | 0.370876 | NaN      | NaN      |
| CcbHLH054 | PNT02498 | 0.481968 | 1.383972 | 0.34825  |
| CcbHLH054 | PNT49259 | 0.40181  | 1.356559 | 0.296198 |
| CcbHLH054 | PNT20403 | 0.371006 | 1.733931 | 0.213968 |
| CcbHLH055 | PNT57202 | 0.372709 | 1.405243 | 0.265227 |
| CcbHLH055 | PNT26361 | 0.416299 | 1.928535 | 0.215863 |
| CcbHLH055 | PNT20268 | 0.346796 | 1.56578  | 0.221485 |
| CcbHLH058 | PNT52177 | 0.573407 | 1.797265 | 0.319044 |
| CcbHLH058 | PNT56888 | 0.426624 | 2.287698 | 0.186486 |
| CcbHLH058 | PNS97934 | 0.409233 | 1.575818 | 0.259696 |
| CcbHLH058 | PNT46705 | 0.438571 | 1.547275 | 0.283448 |
| CcbHLH058 | PNT29960 | 0.407239 | 1.674664 | 0.243176 |
| CcbHLH058 | PNT19953 | 0.394876 | 2.36183  | 0.167191 |
| CcbHLH061 | PNS94332 | 0.364544 | 4.291871 | 0.084938 |
| CcbHLH061 | PNT30298 | 0.391948 | 2.293331 | 0.170908 |
| CcbHLH062 | PNT02498 | 0.463298 | 1.462624 | 0.316758 |
| CcbHLH062 | PNT49259 | 0.36966  | 2.27129  | 0.162753 |
| CcbHLH062 | PNT20403 | 0.340054 | 1.470811 | 0.231202 |
| CcbHLH063 | PNT47564 | 0.343917 | 1.663355 | 0.206761 |
| CcbHLH063 | PNT36309 | 0.336662 | 1.527661 | 0.220377 |

|           |          |          |          |          |
|-----------|----------|----------|----------|----------|
| CcbHLH063 | PNT38258 | 0.319741 | 1.878868 | 0.170178 |
| CcbHLH063 | PNT26639 | 0.458812 | 1.938151 | 0.236727 |
| CcbHLH064 | PNT41429 | 0.346664 | 1.456129 | 0.238072 |
| CcbHLH064 | PNT36348 | 0.32111  | 1.546873 | 0.207587 |
| CcbHLH064 | PNT26709 | 0.454677 | 1.583315 | 0.287168 |
| CcbHLH064 | PNT20883 | 0.31226  | 1.680372 | 0.185828 |
| CcbHLH065 | PNT09623 | 0.346873 | 1.64448  | 0.210932 |
| CcbHLH065 | PNT00400 | 0.359286 | 2.251147 | 0.159601 |
| CcbHLH065 | PNS96429 | 0.505078 | 1.818061 | 0.277812 |
| CcbHLH065 | PNT40462 | 0.490764 | 2.091415 | 0.234656 |
| CcbHLH074 | PNT16382 | 0.367149 | NaN      | NaN      |
| CcbHLH074 | PNT40695 | 0.402756 | 1.558423 | 0.258438 |
| CcbHLH075 | PNT16364 | 0.346725 | 1.937165 | 0.178986 |
| CcbHLH076 | PNT10047 | 0.285073 | 2.639913 | 0.107986 |
| CcbHLH076 | PNT00928 | 0.326322 | NaN      | NaN      |
| CcbHLH078 | PNT60249 | 0.431184 | 1.540725 | 0.279858 |
| CcbHLH078 | PNT13723 | 0.430087 | 1.261472 | 0.340941 |
| CcbHLH080 | PNT04964 | 0.411464 | 1.828059 | 0.225082 |
| CcbHLH080 | PNT51292 | 0.392598 | 1.879378 | 0.208898 |
| CcbHLH080 | PNT51556 | 0.416479 | 2.530465 | 0.164586 |
| CcbHLH081 | PNT53008 | 0.569579 | 1.830694 | 0.311128 |
| CcbHLH083 | PNT44564 | 0.280272 | NaN      | NaN      |
| CcbHLH085 | PNT12114 | 0.292079 | 1.270827 | 0.229834 |
| CcbHLH085 | PNT07935 | 0.425225 | 2.004636 | 0.212121 |
| CcbHLH085 | PNS91223 | 0.416102 | 1.9122   | 0.217604 |
| CcbHLH085 | PNT39723 | 0.297454 | 1.405221 | 0.211678 |
| CcbHLH088 | PNT04113 | 0.356634 | 3.436573 | 0.103776 |
| CcbHLH088 | PNT50311 | 0.373621 | 2.223603 | 0.168025 |
| CcbHLH089 | PNT49677 | 0.284822 | 3.771937 | 0.075511 |
| CcbHLH090 | PNT54440 | 0.254681 | NaN      | NaN      |
| CcbHLH090 | PNT44564 | 0.239404 | NaN      | NaN      |
| CcbHLH092 | PNT49677 | 0.512568 | 2.131443 | 0.240479 |
| CcbHLH096 | PNT15303 | 0.462251 | 2.509113 | 0.184229 |
| CcbHLH096 | PNT24984 | 0.464114 | 2.146349 | 0.216234 |
| CcbHLH097 | PNT37670 | 0.765459 | 3.029412 | 0.252676 |
| CcbHLH099 | PNT53400 | 0.379131 | NaN      | NaN      |
| CcbHLH099 | PNT04055 | 0.3542   | NaN      | NaN      |
| CcbHLH099 | PNT47736 | 0.656523 | NaN      | NaN      |
| CcbHLH099 | PNT50251 | 0.323136 | NaN      | NaN      |
| CcbHLH099 | PNT45651 | 0.394096 | NaN      | NaN      |
| CcbHLH099 | PNT38069 | 0.740982 | NaN      | NaN      |
| CcbHLH100 | PNT06622 | 0.258731 | 1.341272 | 0.1929   |
| CcbHLH100 | PNT47794 | 0.157252 | 2.624879 | 0.059908 |
| CcbHLH100 | PNT38012 | 0.152738 | 2.765409 | 0.055232 |
| CcbHLH100 | PNT35057 | 0.248621 | 1.653657 | 0.150346 |
| CcbHLH102 | PNT59457 | 0.358156 | 1.842865 | 0.194347 |
| CcbHLH102 | PNT11611 | 0.361728 | 1.853335 | 0.195177 |
| CcbHLH102 | PNT39271 | 0.335374 | 1.696584 | 0.197676 |

|           |          |          |          |          |
|-----------|----------|----------|----------|----------|
| CcbHLH103 | PNT48909 | 0.286953 | 2.456462 | 0.116816 |
| CcbHLH103 | PNT35341 | 0.297648 | NaN      | NaN      |
| CcbHLH103 | PNT28057 | 0.28943  | NaN      | NaN      |
| CcbHLH104 | PNT02692 | 0.241599 | 3.204816 | 0.075386 |
| CcbHLH104 | PNT49349 | 0.256411 | 3.303208 | 0.077625 |
| CcbHLH104 | PNT36639 | 0.273252 | 2.154249 | 0.126843 |
| CcbHLH104 | PNT27082 | 0.260134 | 2.100099 | 0.123867 |
| CcbHLH106 | PNT15681 | 0.303597 | 1.60971  | 0.188604 |
| CcbHLH106 | PNT24596 | 0.34729  | 1.938602 | 0.179145 |
| CcbHLH107 | PNT13196 | 0.349335 | 1.448914 | 0.241101 |
| CcbHLH109 | PNS94332 | 0.41992  | 1.890988 | 0.222064 |
| CcbHLH109 | PNT30298 | 0.409524 | 2.910811 | 0.140691 |
| CcbHLH111 | PNT15681 | 0.292687 | 1.49114  | 0.196284 |
| CcbHLH111 | PNT24596 | 0.334365 | 1.945434 | 0.171871 |
| CcbHLH112 | PNT35165 | 0.306788 | NaN      | NaN      |
| CcbHLH112 | PNT28262 | 0.356424 | NaN      | NaN      |
| CcbHLH113 | PNT02692 | 0.235671 | 4.031459 | 0.058458 |
| CcbHLH113 | PNT49349 | 0.297668 | 2.632732 | 0.113064 |
| CcbHLH113 | PNT36639 | 0.317295 | 1.609263 | 0.197168 |
| CcbHLH113 | PNT27082 | 0.307349 | 1.774405 | 0.173212 |
| CcbHLH114 | PNT48979 | 0.388233 | 2.371136 | 0.163733 |
| CcbHLH115 | PNT48909 | 0.283384 | 2.215878 | 0.127888 |
| CcbHLH115 | PNT35341 | 0.344137 | 2.40309  | 0.143206 |
| CcbHLH115 | PNT28057 | 0.339934 | 2.542961 | 0.133676 |
| CcbHLH117 | PNT41649 | 0.331784 | 1.774579 | 0.186965 |
| CcbHLH117 | PNT36201 | 0.294478 | 1.608966 | 0.183023 |
| CcbHLH117 | PNT21113 | 0.308071 | 1.877675 | 0.16407  |
| CcbHLH118 | PNT03691 | 0.405633 | 1.786786 | 0.227018 |
| CcbHLH118 | PNT45271 | 0.40374  | 1.659502 | 0.24329  |
| CcbHLH119 | PNT47713 | 0.443658 | 1.830656 | 0.242349 |
| CcbHLH119 | PNT38088 | 0.450932 | 1.338625 | 0.336862 |
| CcbHLH120 | PNT15223 | 0.313551 | 1.766865 | 0.177462 |
| CcbHLH120 | PNT25060 | 0.232143 | 1.597051 | 0.145357 |
| CcbHLH121 | PNT03984 | 0.334791 | 2.059049 | 0.162595 |
| CcbHLH121 | PNT50177 | 0.326443 | NaN      | NaN      |
| CcbHLH122 | PNT09201 | 0.233521 | 2.72777  | 0.085609 |
| CcbHLH122 | PNT00002 | 0.247502 | NaN      | NaN      |
| CcbHLH124 | PNT09623 | 0.350889 | 1.355321 | 0.258898 |
| CcbHLH124 | PNT00400 | 0.340647 | 1.621677 | 0.210059 |
| CcbHLH124 | PNS96429 | 0.381108 | 1.317788 | 0.289203 |
| CcbHLH124 | PNT40462 | 0.374151 | 1.465643 | 0.255281 |
| CcbHLH125 | PNT10047 | 0.474139 | 2.309576 | 0.205293 |
| CcbHLH125 | PNT00928 | 0.424055 | NaN      | NaN      |
| CcbHLH129 | PNT16564 | 0.508245 | 4.104833 | 0.123816 |
| CcbHLH129 | PNT06006 | 0.419297 | 1.730876 | 0.242245 |
| CcbHLH129 | PNT34390 | 0.434215 | 2.206879 | 0.196755 |
| CcbHLH129 | PNT23859 | 0.454284 | NaN      | NaN      |

|                  |                 |          |          |          |
|------------------|-----------------|----------|----------|----------|
| <i>CcbHLH130</i> | <i>PNT04213</i> | 0.624485 | 1.93177  | 0.323271 |
| <i>CcbHLH131</i> | <i>PNT31521</i> | 0.37743  | 1.870803 | 0.201748 |
| <i>CcbHLH136</i> | <i>PNT16564</i> | 0.414036 | 3.929545 | 0.105365 |
| <i>CcbHLH136</i> | <i>PNT50574</i> | 0.916448 | NaN      | NaN      |
| <i>CcbHLH136</i> | <i>PNT34390</i> | 0.375408 | 1.751747 | 0.214305 |
| <i>CcbHLH136</i> | <i>PNT23859</i> | 0.395698 | 2.8209   | 0.140274 |
| <i>CcbHLH137</i> | <i>PNT05883</i> | 0.490734 | 1.40722  | 0.348726 |
| <i>CcbHLH137</i> | <i>PNT04213</i> | 0.594475 | 1.589967 | 0.373891 |
| <i>CcbHLH137</i> | <i>PNT34242</i> | 0.465996 | 1.446159 | 0.32223  |
| <i>CcbHLH144</i> | <i>PNT08075</i> | 0.331652 | 1.406553 | 0.235791 |
| <i>CcbHLH145</i> | <i>PNT03984</i> | 0.240688 | 1.855189 | 0.129738 |
| <i>CcbHLH145</i> | <i>PNT50177</i> | 0.252087 | 3.717722 | 0.067807 |
| <i>CcbHLH146</i> | <i>PNT12114</i> | 0.281933 | 1.235431 | 0.228206 |
| <i>CcbHLH146</i> | <i>PNS91223</i> | 0.390369 | 1.402608 | 0.278317 |
| <i>CcbHLH146</i> | <i>PNT39723</i> | 0.336278 | 1.131326 | 0.297242 |
| <i>CcbHLH150</i> | <i>PNT51632</i> | 0.347751 | 2.106323 | 0.165099 |

---



**Table S5.** *Ka/Ks analysis for the CcbHLH and C. kanehirae* homologous genes

| Cc-Gene          | At-Gene       | Ka       | Ks       | Ka/Ks    |
|------------------|---------------|----------|----------|----------|
| <i>CcbHLH001</i> | CKAN_00040200 | 0.005705 | 0.038992 | 0.14631  |
| <i>CcbHLH002</i> | CKAN_00069300 | 0.005072 | 0.02249  | 0.225512 |
| <i>CcbHLH003</i> | CKAN_00079900 | 0.018835 | 0.036623 | 0.514289 |
| <i>CcbHLH004</i> | CKAN_00083300 | 0.01367  | 0.009783 | 1.397346 |
| <i>CcbHLH005</i> | CKAN_00086200 | 0.06516  | 0.105861 | 0.61553  |
| <i>CcbHLH006</i> | CKAN_00093200 | 0.004264 | 0.019085 | 0.223443 |
| <i>CcbHLH007</i> | CKAN_00123100 | 0.011962 | 0.015847 | 0.754836 |
| <i>CcbHLH009</i> | CKAN_00172600 | 0.001403 | 0.028666 | 0.048927 |
| <i>CcbHLH010</i> | CKAN_00174500 | 0.069818 | 0.06544  | 1.066892 |
| <i>CcbHLH011</i> | CKAN_00209700 | 0.009267 | 0.038668 | 0.239641 |
| <i>CcbHLH012</i> | CKAN_00210400 | 0.007278 | 0.009788 | 0.743589 |
| <i>CcbHLH013</i> | CKAN_00235600 | 0.003876 | 0.017367 | 0.223164 |
| <i>CcbHLH014</i> | CKAN_00238300 | 0.001273 | 0.013647 | 0.093286 |
| <i>CcbHLH015</i> | CKAN_00297600 | 0.004631 | 0.025937 | 0.178528 |
| <i>CcbHLH016</i> | CKAN_00313300 | 0.01326  | 0.044685 | 0.296743 |
| <i>CcbHLH017</i> | CKAN_00336300 | 0.001297 | 0.020409 | 0.06355  |
| <i>CcbHLH012</i> | CKAN_00093200 | 0.236947 | 0.513005 | 0.46188  |
| <i>CcbHLH006</i> | CKAN_00210400 | 0.237585 | 0.526228 | 0.451487 |
| <i>CcbHLH002</i> | CKAN_00172600 | 0.094914 | 0.493676 | 0.19226  |
| <i>CcbHLH008</i> | CKAN_00152700 | 0.013472 | 0.035373 | 0.380839 |
| <i>CcbHLH012</i> | CKAN_00628900 | 0.232751 | 0.880167 | 0.26444  |
| <i>CcbHLH005</i> | CKAN_00615000 | 0.211236 | 1.2797   | 0.165067 |
| <i>CcbHLH006</i> | CKAN_00628900 | 0.289126 | 0.989126 | 0.292305 |
| <i>CcbHLH013</i> | CKAN_00640400 | 0.154198 | 1.025908 | 0.150304 |
| <i>CcbHLH014</i> | CKAN_00639100 | 0.206316 | 0.983611 | 0.209753 |
| <i>CcbHLH004</i> | CKAN_00657400 | 0.418242 | 1.208188 | 0.346173 |
| <i>CcbHLH010</i> | CKAN_00635900 | 0.370651 | 1.519535 | 0.243924 |
| <i>CcbHLH015</i> | CKAN_00851700 | 0.153363 | 0.652913 | 0.23489  |
| <i>CcbHLH012</i> | CKAN_01157500 | 0.27568  | 1.005723 | 0.274111 |
| <i>CcbHLH005</i> | CKAN_01152000 | 0.21399  | 1.186284 | 0.180387 |
| <i>CcbHLH006</i> | CKAN_01157500 | 0.371884 | 1.010547 | 0.368002 |
| <i>CcbHLH013</i> | CKAN_01163500 | 0.20416  | 0.997132 | 0.204748 |
| <i>CcbHLH014</i> | CKAN_01163000 | 0.270309 | 0.908778 | 0.297442 |
| <i>CcbHLH010</i> | CKAN_01161300 | 0.342339 | 2.4434   | 0.140108 |
| <i>CcbHLH015</i> | CKAN_01610300 | 0.289853 | 1.224251 | 0.23676  |
| <i>CcbHLH001</i> | CKAN_02091900 | 0.243859 | 0.912859 | 0.267137 |
| <i>CcbHLH129</i> | CKAN_00486600 | 0.355557 | 0.926623 | 0.383713 |
| <i>CcbHLH124</i> | CKAN_01094000 | 0.313592 | 0.945418 | 0.331696 |
| <i>CcbHLH126</i> | CKAN_01446500 | 0.297966 | 0.869566 | 0.342661 |
| <i>CcbHLH124</i> | CKAN_02314600 | 0.038262 | 0.079585 | 0.480769 |

|           |               |          |          |          |
|-----------|---------------|----------|----------|----------|
| CcbHLH125 | CKAN_02323400 | 0.252058 | 0.459542 | 0.548498 |
| CcbHLH129 | CKAN_02361800 | 0.002533 | 0.045641 | 0.055492 |
| CcbHLH130 | CKAN_02372300 | 0.004829 | 0.024959 | 0.193458 |
| CcbHLH123 | CKAN_02276000 | 0.009947 | 0.060837 | 0.163501 |
| CcbHLH121 | CKAN_02255000 | 0.01791  | 0.041115 | 0.435617 |
| CcbHLH122 | CKAN_02242100 | 0.008303 | 0.027234 | 0.304859 |
| CcbHLH124 | CKAN_02413200 | 0.191015 | 0.538584 | 0.354662 |
| CcbHLH121 | CKAN_02582300 | 0.221462 | 1.565148 | 0.141496 |
| CcbHLH136 | CKAN_00486600 | 0.201376 | 0.537351 | 0.374758 |
| CcbHLH133 | CKAN_00514000 | 0.130461 | 1.335488 | 0.097688 |
| CcbHLH134 | CKAN_00511800 | 0.135023 | 0.75243  | 0.17945  |
| CcbHLH142 | CKAN_00510700 | 0.380008 | NaN      | NaN      |
| CcbHLH141 | CKAN_02314700 | 0.19675  | 0.529168 | 0.37181  |
| CcbHLH131 | CKAN_02520600 | 0.059031 | 0.103492 | 0.570396 |
| CcbHLH132 | CKAN_02513000 | 0.01326  | 0.035232 | 0.376368 |
| CcbHLH133 | CKAN_02472300 | 0.003183 | 0.034546 | 0.09214  |
| CcbHLH134 | CKAN_02471500 | 0.010231 | 0.028222 | 0.362517 |
| CcbHLH135 | CKAN_02470600 | 0.013687 | 0.020229 | 0.676603 |
| CcbHLH136 | CKAN_02457600 | 0.004965 | 0.042615 | 0.116505 |
| CcbHLH137 | CKAN_02447100 | 0.030267 | 0.033274 | 0.909613 |
| CcbHLH139 | CKAN_02430000 | 0.015287 | 0.028677 | 0.533075 |
| CcbHLH140 | CKAN_02428500 | 0.083907 | 0.149307 | 0.561978 |
| CcbHLH141 | CKAN_02413200 | 0.007863 | 0.035353 | 0.222409 |
| CcbHLH142 | CKAN_02405400 | 0.002505 | 0.034801 | 0.071979 |
| CcbHLH144 | CKAN_01263000 | 0.113423 | 0.332149 | 0.341483 |
| CcbHLH146 | CKAN_01538500 | 0.180344 | 0.831961 | 0.21677  |
| CcbHLH149 | CKAN_01813000 | 0.251195 | 1.063736 | 0.236144 |
| CcbHLH145 | CKAN_02255000 | 0.228829 | 1.624656 | 0.140848 |
| CcbHLH144 | CKAN_02621200 | 0.016539 | 0.020409 | 0.810347 |
| CcbHLH145 | CKAN_02582300 | 0.001432 | 0.021749 | 0.065832 |
| CcbHLH146 | CKAN_02573200 | 0.013522 | 0.048354 | 0.279654 |
| CcbHLH148 | CKAN_02553800 | 0.029111 | 0.07446  | 0.390964 |
| CcbHLH150 | CKAN_02543500 | 0.002565 | 0.022286 | 0.115089 |
| CcbHLH147 | CKAN_02685100 | 0.274031 | 0.651972 | 0.420311 |
| CcbHLH028 | CKAN_00210400 | 0.235583 | 0.887033 | 0.265585 |
| CcbHLH027 | CKAN_00086200 | 0.200663 | 1.316786 | 0.152389 |
| CcbHLH028 | CKAN_00093200 | 0.290669 | 1.030825 | 0.281977 |
| CcbHLH036 | CKAN_00083300 | 0.424642 | 1.131448 | 0.375308 |
| CcbHLH031 | CKAN_00238300 | 0.206419 | 1.0341   | 0.199613 |
| CcbHLH033 | CKAN_00235600 | 0.15278  | 0.962703 | 0.158698 |
| CcbHLH019 | CKAN_00384000 | 0.011908 | 0.044579 | 0.267115 |
| CcbHLH020 | CKAN_00486600 | 0.088955 | 0.167251 | 0.531867 |
| CcbHLH021 | CKAN_00510700 | 0.007166 | 0.024933 | 0.287396 |
| CcbHLH022 | CKAN_00511800 | 0.010954 | 0.034282 | 0.319535 |

|           |               |          |          |          |
|-----------|---------------|----------|----------|----------|
| CcbHLH023 | CKAN_00514000 | 0.015813 | 0.041657 | 0.379614 |
| CcbHLH024 | CKAN_00528300 | 0.006891 | 0.034924 | 0.197305 |
| CcbHLH025 | CKAN_00549500 | 0.014469 | 0.042322 | 0.341869 |
| CcbHLH026 | CKAN_00605500 | 0.046828 | 0.047088 | 0.994463 |
| CcbHLH027 | CKAN_00615000 | 0.015715 | 0.053334 | 0.294649 |
| CcbHLH028 | CKAN_00628900 | 0.001959 | 0.034351 | 0.057035 |
| CcbHLH029 | CKAN_00635900 | 0.008784 | 0.014693 | 0.597847 |
| CcbHLH030 | CKAN_00638100 | 0.011378 | 0.004323 | 2.632154 |
| CcbHLH031 | CKAN_00639100 | 0.001303 | 0.019049 | 0.068385 |
| CcbHLH032 | CKAN_00640000 | 0.002922 | 0.05452  | 0.053592 |
| CcbHLH033 | CKAN_00640400 | 0.001185 | 0.03304  | 0.035867 |
| CcbHLH034 | CKAN_00643700 | 0.060853 | 0.15026  | 0.404985 |
| CcbHLH035 | CKAN_00649400 | 0.015702 | 0        | #NAME?   |
| CcbHLH036 | CKAN_00657400 | 0.008501 | 0.019267 | 0.441222 |
| CcbHLH037 | CKAN_00661800 | 0.01844  | 0.051578 | 0.357514 |
| CcbHLH018 | CKAN_00360900 | 0.001674 | 0        | #NAME?   |
| CcbHLH029 | CKAN_00640000 | 0.572202 | NaN      | NaN      |
| CcbHLH032 | CKAN_00635900 | 0.605557 | NaN      | NaN      |
| CcbHLH028 | CKAN_01157500 | 0.189233 | 0.539707 | 0.350621 |
| CcbHLH029 | CKAN_01161300 | 0.22523  | 1.054793 | 0.21353  |
| CcbHLH031 | CKAN_01163000 | 0.143667 | 0.59202  | 0.242672 |
| CcbHLH033 | CKAN_01163500 | 0.174111 | 0.501592 | 0.347117 |
| CcbHLH035 | CKAN_01167200 | 0.213437 | 0.541122 | 0.394434 |
| CcbHLH027 | CKAN_01152000 | 0.107629 | 0.680555 | 0.158148 |
| CcbHLH036 | CKAN_01149700 | 0.577273 | 1.463614 | 0.394416 |
| CcbHLH018 | CKAN_01137600 | 0.092781 | 0.949391 | 0.097727 |
| CcbHLH025 | CKAN_01382600 | 0.255355 | 1.312404 | 0.19457  |
| CcbHLH018 | CKAN_02065000 | 0.197107 | 1.407793 | 0.140011 |
| CcbHLH019 | CKAN_02028400 | 0.227486 | 1.197159 | 0.190022 |
| CcbHLH021 | CKAN_02470800 | 0.140858 | 0.471001 | 0.299061 |
| CcbHLH022 | CKAN_02471500 | 0.130382 | 0.726845 | 0.17938  |
| CcbHLH023 | CKAN_02472300 | 0.141022 | 1.167334 | 0.120807 |
| CcbHLH020 | CKAN_02457600 | 0.319308 | 0.668907 | 0.477357 |
| CcbHLH041 | CKAN_00297600 | 0.130301 | 0.665314 | 0.19585  |
| CcbHLH038 | CKAN_00692700 | 0.005147 | 0.039895 | 0.129019 |
| CcbHLH039 | CKAN_00742100 | 0.004215 | 0.020113 | 0.209565 |
| CcbHLH040 | CKAN_00844100 | 0.022616 | 0.033491 | 0.675281 |
| CcbHLH041 | CKAN_00851700 | 0.015263 | 0.010268 | 1.486515 |
| CcbHLH043 | CKAN_00959300 | 0.039983 | 0.065873 | 0.606978 |
| CcbHLH044 | CKAN_00968000 | 0.006578 | 0.032895 | 0.199957 |
| CcbHLH045 | CKAN_00968800 | 0.025345 | 0.048016 | 0.527839 |
| CcbHLH046 | CKAN_00973600 | 0.022574 | 0.025457 | 0.886761 |
| CcbHLH047 | CKAN_01002200 | 0        | 0        | NaN      |

|           |               |          |          |          |
|-----------|---------------|----------|----------|----------|
| CcbHLH043 | CKAN_01683800 | 0.361091 | 0.728616 | 0.495585 |
| CcbHLH045 | CKAN_01571900 | 0.255622 | 1.727308 | 0.147988 |
| CcbHLH043 | CKAN_01548800 | 0.406237 | 1.383142 | 0.293706 |
| CcbHLH046 | CKAN_01620800 | 0.269822 | 0.580204 | 0.465047 |
| CcbHLH041 | CKAN_01610300 | 0.319489 | 1.40791  | 0.226925 |
| CcbHLH043 | CKAN_01847800 | 0.402001 | 1.299401 | 0.309374 |
| CcbHLH051 | CKAN_00278200 | 0.014097 | 0.054514 | 0.258598 |
| CcbHLH055 | CKAN_00235600 | 0.270347 | 1.02085  | 0.264826 |
| CcbHLH056 | CKAN_00238300 | 0.265179 | 0.925431 | 0.286546 |
| CcbHLH058 | CKAN_00093200 | 0.355491 | 0.94915  | 0.374536 |
| CcbHLH059 | CKAN_00086200 | 0.227377 | 1.165972 | 0.19501  |
| CcbHLH060 | CKAN_00083300 | 0.494321 | 1.538377 | 0.321326 |
| CcbHLH058 | CKAN_00210400 | 0.291649 | 1.012303 | 0.288104 |
| CcbHLH060 | CKAN_00657400 | 0.286115 | 0.780505 | 0.366576 |
| CcbHLH061 | CKAN_00360900 | 0.094691 | 0.926769 | 0.102173 |
| CcbHLH062 | CKAN_00649400 | 0.091712 | 0.736794 | 0.124474 |
| CcbHLH054 | CKAN_00649400 | 0.085124 | 0.427015 | 0.199347 |
| CcbHLH055 | CKAN_00640400 | 0.174708 | 0.557897 | 0.313156 |
| CcbHLH056 | CKAN_00639100 | 0.144982 | 0.576776 | 0.251366 |
| CcbHLH057 | CKAN_00635900 | 0.2384   | 1.019443 | 0.233853 |
| CcbHLH058 | CKAN_00628900 | 0.192513 | 0.498978 | 0.385814 |
| CcbHLH059 | CKAN_00615000 | 0.109085 | 0.613379 | 0.177842 |
| CcbHLH062 | CKAN_01167200 | 0.313305 | 1.171819 | 0.267366 |
| CcbHLH052 | CKAN_01216400 | 0.012862 | 0.010209 | 1.259926 |
| CcbHLH053 | CKAN_01202000 | 0.0263   | 0.037144 | 0.708041 |
| CcbHLH055 | CKAN_01163500 | 0.008355 | 0.02082  | 0.401291 |
| CcbHLH056 | CKAN_01163000 | 0.003944 | 0.019641 | 0.2008   |
| CcbHLH057 | CKAN_01161300 | 0.004445 | 0.027258 | 0.163082 |
| CcbHLH058 | CKAN_01157500 | 0.035265 | 0.039626 | 0.88994  |
| CcbHLH059 | CKAN_01152000 | 0.007901 | 0.054029 | 0.146238 |
| CcbHLH061 | CKAN_01137600 | 0.003301 | 0.012091 | 0.272997 |
| CcbHLH063 | CKAN_01116500 | 0.004192 | 0.013865 | 0.30235  |
| CcbHLH064 | CKAN_01112300 | 0.026598 | 0.047394 | 0.5612   |
| CcbHLH065 | CKAN_01094000 | 0.016096 | 0.02629  | 0.612256 |
| CcbHLH067 | CKAN_01070800 | 0.147698 | 0.277406 | 0.532427 |
| CcbHLH049 | CKAN_01263000 | 0        | 0.031751 | 0        |
| CcbHLH051 | CKAN_01238400 | 0.003495 | 0.011829 | 0.295466 |
| CcbHLH067 | CKAN_01446500 | 0.172181 | 0.525697 | 0.327529 |
| CcbHLH061 | CKAN_02065000 | 0.197359 | 1.219051 | 0.161896 |
| CcbHLH065 | CKAN_02314700 | 0.316309 | 0.916714 | 0.345047 |
| CcbHLH049 | CKAN_02621200 | 0.11089  | 0.34233  | 0.323926 |
| CcbHLH048 | CKAN_02685100 | 0.004277 | 0.008043 | 0.531714 |
| CcbHLH075 | CKAN_00549500 | 0.273117 | 1.18865  | 0.229771 |
| CcbHLH076 | CKAN_01070800 | 0.160301 | 0.54792  | 0.292562 |

|           |               |          |          |          |
|-----------|---------------|----------|----------|----------|
| CcbHLH076 | CKAN_01446500 | 0.004912 | 0.008863 | 0.554232 |
| CcbHLH078 | CKAN_01464100 | 0.004464 | 0.025567 | 0.17459  |
| CcbHLH079 | CKAN_01466700 | 0.010903 | 0.0125   | 0.872242 |
| CcbHLH070 | CKAN_01298000 | 0.003806 | 0.027494 | 0.138424 |
| CcbHLH074 | CKAN_01381200 | 0.001555 | 0.036405 | 0.042726 |
| CcbHLH075 | CKAN_01382600 | 0.016822 | 0.03752  | 0.448343 |
| CcbHLH079 | CKAN_01773700 | 0.28431  | 0.918134 | 0.30966  |
| CcbHLH070 | CKAN_02204900 | 0.23415  | 0.935347 | 0.250335 |
| CcbHLH076 | CKAN_02323400 | 0.334966 | 0.843777 | 0.396983 |
| CcbHLH082 | CKAN_00138900 | 0.152852 | 0.71575  | 0.213555 |
| CcbHLH082 | CKAN_00278200 | 0.194575 | 1.063363 | 0.182981 |
| CcbHLH091 | CKAN_00973600 | 0.27911  | 0.554032 | 0.503781 |
| CcbHLH080 | CKAN_00851700 | 0.315381 | 1.38842  | 0.227151 |
| CcbHLH087 | CKAN_00959300 | 0.356791 | 0.641412 | 0.55626  |
| CcbHLH089 | CKAN_00929600 | 0.218791 | 0.95217  | 0.229781 |
| CcbHLH083 | CKAN_00968800 | 0.270879 | 1.841344 | 0.147109 |
| CcbHLH084 | CKAN_00959300 | 0.419967 | 1.546067 | 0.271636 |
| CcbHLH090 | CKAN_01571900 | 0.201567 | 2.370151 | 0.085044 |
| CcbHLH083 | CKAN_01626400 | 0.196065 | 2.238392 | 0.087592 |
| CcbHLH080 | CKAN_01610300 | 0.015603 | 0.014926 | 1.045343 |
| CcbHLH081 | CKAN_01588000 | 0.002447 | 0.008811 | 0.27773  |
| CcbHLH082 | CKAN_01585700 | 0.000849 | 0.014635 | 0.05799  |
| CcbHLH083 | CKAN_01571900 | 0.004101 | 0.025021 | 0.163907 |
| CcbHLH084 | CKAN_01548800 | 0.038521 | 0.059955 | 0.6425   |
| CcbHLH085 | CKAN_01538500 | 0.001698 | 0.044706 | 0.037977 |
| CcbHLH086 | CKAN_01524900 | 0.044269 | 0.05209  | 0.849842 |
| CcbHLH087 | CKAN_01683800 | 0.073755 | 0.16527  | 0.446272 |
| CcbHLH088 | CKAN_01666800 | 0.005409 | 0.023146 | 0.233688 |
| CcbHLH089 | CKAN_01640400 | 0.007676 | 0.07642  | 0.100445 |
| CcbHLH090 | CKAN_01626400 | 0.002635 | 0.028295 | 0.093118 |
| CcbHLH091 | CKAN_01620700 | 0.029413 | 0.050826 | 0.578707 |
| CcbHLH087 | CKAN_01548800 | 0.417748 | 1.606017 | 0.260114 |
| CcbHLH084 | CKAN_01683800 | 0.447875 | 1.302331 | 0.343903 |
| CcbHLH084 | CKAN_01847800 | 0.199015 | 0.875915 | 0.227209 |
| CcbHLH088 | CKAN_01859800 | 0.237518 | 1.253209 | 0.189528 |
| CcbHLH087 | CKAN_01847800 | 0.439215 | 1.259685 | 0.348671 |
| CcbHLH089 | CKAN_01887300 | 0.296173 | 1.227583 | 0.241265 |
| CcbHLH085 | CKAN_02573200 | 0.193504 | 0.888961 | 0.217675 |
| CcbHLH094 | CKAN_00959300 | 0.446755 | 1.251257 | 0.357045 |
| CcbHLH092 | CKAN_00929600 | 0.366609 | 1.030485 | 0.355763 |
| CcbHLH101 | CKAN_01466700 | 0.267962 | 0.867458 | 0.308905 |
| CcbHLH094 | CKAN_01548800 | 0.239988 | 0.846223 | 0.283599 |
| CcbHLH093 | CKAN_01666800 | 0.231278 | 1.198621 | 0.192953 |

|                  |               |          |          |          |
|------------------|---------------|----------|----------|----------|
| <i>CcbHLH094</i> | CKAN_01683800 | 0.496511 | 1.237931 | 0.401081 |
| <i>CcbHLH092</i> | CKAN_01640400 | 0.29541  | 1.220625 | 0.242015 |
| <i>CcbHLH092</i> | CKAN_01887300 | 0.023351 | 0.037731 | 0.618876 |
| <i>CcbHLH093</i> | CKAN_01859800 | 0.004584 | 0.023562 | 0.194535 |
| <i>CcbHLH094</i> | CKAN_01847800 | 0.0032   | 0.022101 | 0.14479  |
| <i>CcbHLH096</i> | CKAN_01845800 | 0.011973 | 0.024392 | 0.490845 |
| <i>CcbHLH097</i> | CKAN_01813000 | 0.002374 | 0.013349 | 0.177874 |
| <i>CcbHLH099</i> | CKAN_01794000 | 0.001834 | 0.021128 | 0.086791 |
| <i>CcbHLH100</i> | CKAN_01790000 | 0.004336 | 0.01806  | 0.240112 |
| <i>CcbHLH101</i> | CKAN_01773700 | 0.011389 | 0.025081 | 0.45408  |
| <i>CcbHLH102</i> | CKAN_01718100 | 0.023189 | 0.073473 | 0.315619 |
| <i>CcbHLH108</i> | CKAN_00384000 | 0.292859 | 1.338536 | 0.21879  |
| <i>CcbHLH109</i> | CKAN_00360900 | 0.178678 | 1.482109 | 0.120557 |
| <i>CcbHLH109</i> | CKAN_01137600 | 0.190645 | 1.218496 | 0.156459 |
| <i>CcbHLH103</i> | CKAN_01288800 | 0.114829 | 0.638054 | 0.179968 |
| <i>CcbHLH105</i> | CKAN_01347400 | 0.109519 | 0.563968 | 0.194193 |
| <i>CcbHLH103</i> | CKAN_01903400 | 0.002757 | 0.023276 | 0.118438 |
| <i>CcbHLH104</i> | CKAN_01917400 | 0.004105 | 0.006953 | 0.590486 |
| <i>CcbHLH105</i> | CKAN_01956500 | 0.003746 | 0.006487 | 0.577581 |
| <i>CcbHLH106</i> | CKAN_01959800 | 0.003372 | 0.021375 | 0.157761 |
| <i>CcbHLH107</i> | CKAN_02009900 | 0.008532 | 0.006414 | 1.330311 |
| <i>CcbHLH108</i> | CKAN_02028400 | 0.001034 | 0.022668 | 0.045629 |
| <i>CcbHLH109</i> | CKAN_02065000 | 0.009475 | 0.01821  | 0.520313 |
| <i>CcbHLH103</i> | CKAN_02168200 | 0.1902   | 1.167879 | 0.162859 |
| <i>CcbHLH106</i> | CKAN_02212300 | 0.234394 | 0.888547 | 0.263795 |
| <i>CcbHLH104</i> | CKAN_02178900 | 0.184425 | 1.328595 | 0.138812 |
| <i>CcbHLH112</i> | CKAN_01298000 | 0.235369 | 1.046345 | 0.224944 |
| <i>CcbHLH115</i> | CKAN_01288800 | 0.180647 | 1.014643 | 0.178041 |
| <i>CcbHLH115</i> | CKAN_01903400 | 0.192819 | 1.15363  | 0.167141 |
| <i>CcbHLH111</i> | CKAN_01959800 | 0.222376 | 0.952893 | 0.23337  |
| <i>CcbHLH113</i> | CKAN_01917400 | 0.170995 | 1.309259 | 0.130605 |
| <i>CcbHLH111</i> | CKAN_02212300 | 0.002764 | 0.015654 | 0.176589 |
| <i>CcbHLH112</i> | CKAN_02204900 | 0.007521 | 0.019545 | 0.384814 |
| <i>CcbHLH113</i> | CKAN_02178900 | 0.002011 | 0.020272 | 0.09919  |
| <i>CcbHLH114</i> | CKAN_02171400 | 0.005622 | 0.035009 | 0.160599 |
| <i>CcbHLH115</i> | CKAN_02168200 | 0.004112 | 0.013986 | 0.294029 |
| <i>CcbHLH116</i> | CKAN_02156200 | 0.00755  | 0.03025  | 0.249596 |
| <i>CcbHLH117</i> | CKAN_02150200 | 0.089641 | 0.128287 | 0.698757 |
| <i>CcbHLH118</i> | CKAN_02091900 | 0.011999 | 0.010222 | 1.173874 |
| <i>CcbHLH119</i> | CKAN_02081300 | 0.004198 | 0.012481 | 0.336333 |
| <i>CcbHLH120</i> | CKAN_02081200 | 0.006048 | 0.043808 | 0.138066 |

**Table S6.** *CcbHLHs* protein interaction analysis

| <i>Cinnamomun<br/>camphora</i> protein | <i>Cinnamomun<br/>camphora</i> protein | <i>Arabidopsis<br/>thaliana</i> protein | <i>Arabidopsis<br/>thaliana</i> protein | score |
|----------------------------------------|----------------------------------------|-----------------------------------------|-----------------------------------------|-------|
| CcbHLH005                              | CcbHLH148                              | AT5G62610.1                             | AT1G29950.2                             | 0.618 |
| CcbHLH005                              | CcbHLH110                              | AT5G62610.1                             | AT1G31050.1                             | 0.576 |
| CcbHLH005                              | CcbHLH146                              | AT5G62610.1                             | AT1G68810.1                             | 0.59  |
| CcbHLH005                              | CcbHLH144                              | AT5G62610.1                             | AT2G31730.1                             | 0.485 |
| CcbHLH005                              | CcbHLH016                              | AT5G62610.1                             | AT2G41130.1                             | 0.619 |
| CcbHLH005                              | CcbHLH117                              | AT5G62610.1                             | AT3G19860.2                             | 0.402 |
| CcbHLH005                              | CcbHLH112                              | AT5G62610.1                             | AT3G20640.1                             | 0.637 |
| CcbHLH005                              | CcbHLH038                              | AT5G62610.1                             | AT3G47640.2                             | 0.599 |
| CcbHLH005                              | CcbHLH072                              | AT5G62610.1                             | AT4G16430.1                             | 0.615 |
| CcbHLH005                              | CcbHLH030                              | AT5G62610.1                             | AT4G29100.1                             | 0.605 |
| CcbHLH005                              | CcbHLH043                              | AT5G62610.1                             | AT5G51780.1                             | 0.616 |
| CcbHLH005                              | CcbHLH122                              | AT5G62610.1                             | AT5G53210.1                             | 0.485 |
| CcbHLH005                              | CcbHLH036                              | AT5G62610.1                             | AT5G56960.1                             | 0.72  |
| CcbHLH005                              | CcbHLH056                              | AT5G62610.1                             | AT5G65640.1                             | 0.461 |
| CcbHLH007                              | CcbHLH137                              | AT5G61270.1                             | AT1G09530.2                             | 0.635 |
| CcbHLH007                              | CcbHLH150                              | AT5G61270.1                             | AT2G20180.2                             | 0.641 |
| CcbHLH007                              | CcbHLH079                              | AT5G61270.1                             | AT2G43010.1                             | 0.704 |
| CcbHLH007                              | CcbHLH138                              | AT5G61270.1                             | AT3G06120.1                             | 0.424 |
| CcbHLH007                              | CcbHLH074                              | AT5G61270.1                             | AT5G08130.5                             | 0.449 |
| CcbHLH011                              | CcbHLH148                              | AT2G42300.1                             | AT1G29950.2                             | 0.616 |
| CcbHLH011                              | CcbHLH146                              | AT2G42300.1                             | AT1G68810.1                             | 0.584 |
| CcbHLH011                              | CcbHLH016                              | AT2G42300.1                             | AT2G41130.1                             | 0.6   |
| CcbHLH011                              | CcbHLH038                              | AT2G42300.1                             | AT3G47640.2                             | 0.416 |
| CcbHLH011                              | CcbHLH072                              | AT2G42300.1                             | AT4G16430.1                             | 0.598 |
| CcbHLH011                              | CcbHLH030                              | AT2G42300.1                             | AT4G29100.1                             | 0.604 |
| CcbHLH011                              | CcbHLH043                              | AT2G42300.1                             | AT5G51780.1                             | 0.615 |
| CcbHLH011                              | CcbHLH056                              | AT2G42300.1                             | AT5G65640.1                             | 0.626 |
| CcbHLH011                              | CcbHLH112                              | AT2G42300.1                             | AT3G20640.1                             | 0.636 |
| CcbHLH011                              | CcbHLH036                              | AT2G42300.1                             | AT5G56960.1                             | 0.695 |
| CcbHLH016                              | CcbHLH148                              | AT2G41130.1                             | AT1G29950.2                             | 0.615 |
| CcbHLH016                              | CcbHLH110                              | AT2G41130.1                             | AT1G31050.1                             | 0.416 |
| CcbHLH016                              | CcbHLH117                              | AT2G41130.1                             | AT3G19860.2                             | 0.402 |
| CcbHLH016                              | CcbHLH096                              | AT2G41130.1                             | AT5G43650.1                             | 0.416 |
| CcbHLH016                              | CcbHLH056                              | AT2G41130.1                             | AT5G65640.1                             | 0.448 |
| CcbHLH016                              | CcbHLH064                              | AT2G41130.1                             | AT4G34530.1                             | 0.457 |
| CcbHLH016                              | CcbHLH109                              | AT2G41130.1                             | AT5G57150.4                             | 0.468 |
| CcbHLH016                              | CcbHLH038                              | AT2G41130.1                             | AT3G47640.2                             | 0.491 |
| CcbHLH016                              | CcbHLH081                              | AT2G41130.1                             | AT5G50915.1                             | 0.551 |
| CcbHLH016                              | CcbHLH030                              | AT2G41130.1                             | AT4G29100.1                             | 0.592 |
| CcbHLH016                              | CcbHLH043                              | AT2G41130.1                             | AT5G51780.1                             | 0.597 |
| CcbHLH016                              | CcbHLH112                              | AT2G41130.1                             | AT3G20640.1                             | 0.632 |
| CcbHLH016                              | CcbHLH036                              | AT2G41130.1                             | AT5G56960.1                             | 0.683 |



|           |           |             |             |       |
|-----------|-----------|-------------|-------------|-------|
| CcbHLH024 | CcbHLH050 | AT3G19500.1 | AT1G49770.1 | 0.45  |
| CcbHLH024 | CcbHLH139 | AT3G19500.1 | AT1G68920.1 | 0.592 |
| CcbHLH024 | CcbHLH091 | AT3G19500.1 | AT2G31210.1 | 0.581 |
| CcbHLH024 | CcbHLH105 | AT3G19500.1 | AT5G54680.1 | 0.441 |
| CcbHLH024 | CcbHLH081 | AT3G19500.1 | AT5G50915.1 | 0.518 |
| CcbHLH024 | CcbHLH109 | AT3G19500.1 | AT5G57150.4 | 0.567 |
| CcbHLH024 | CcbHLH092 | AT3G19500.1 | AT4G00050.1 | 0.616 |
| CcbHLH024 | CcbHLH055 | AT3G19500.1 | AT4G37850.1 | 0.636 |
| CcbHLH026 | CcbHLH144 | AT4G36930.1 | AT2G31730.1 | 0.487 |
| CcbHLH026 | CcbHLH113 | AT4G36930.1 | AT3G50330.1 | 0.616 |
| CcbHLH026 | CcbHLH036 | AT4G36930.1 | AT5G56960.1 | 0.59  |
| CcbHLH026 | CcbHLH111 | AT4G36930.1 | AT5G09750.1 | 0.596 |
| CcbHLH030 | CcbHLH148 | AT4G29100.1 | AT1G29950.2 | 0.597 |
| CcbHLH030 | CcbHLH146 | AT4G29100.1 | AT1G68810.1 | 0.645 |
| CcbHLH030 | CcbHLH117 | AT4G29100.1 | AT3G19860.2 | 0.402 |
| CcbHLH030 | CcbHLH038 | AT4G29100.1 | AT3G47640.2 | 0.459 |
| CcbHLH030 | CcbHLH056 | AT4G29100.1 | AT5G65640.1 | 0.417 |
| CcbHLH030 | CcbHLH064 | AT4G29100.1 | AT4G34530.1 | 0.48  |
| CcbHLH030 | CcbHLH043 | AT4G29100.1 | AT5G51780.1 | 0.586 |
| CcbHLH030 | CcbHLH036 | AT4G29100.1 | AT5G56960.1 | 0.639 |
| CcbHLH030 | CcbHLH081 | AT4G29100.1 | AT5G50915.1 | 0.658 |
| CcbHLH036 | CcbHLH148 | AT5G56960.1 | AT1G29950.2 | 0.709 |
| CcbHLH036 | CcbHLH050 | AT5G56960.1 | AT1G49770.1 | 0.618 |
| CcbHLH036 | CcbHLH146 | AT5G56960.1 | AT1G68810.1 | 0.743 |
| CcbHLH036 | CcbHLH052 | AT5G56960.1 | AT2G28160.1 | 0.628 |
| CcbHLH036 | CcbHLH095 | AT5G56960.1 | AT2G31220.1 | 0.753 |
| CcbHLH036 | CcbHLH112 | AT5G56960.1 | AT3G20640.1 | 0.803 |
| CcbHLH036 | CcbHLH038 | AT5G56960.1 | AT3G47640.2 | 0.548 |
| CcbHLH036 | CcbHLH081 | AT5G56960.1 | AT5G50915.1 | 0.633 |
| CcbHLH036 | CcbHLH043 | AT5G56960.1 | AT5G51780.1 | 0.686 |
| CcbHLH036 | CcbHLH056 | AT5G56960.1 | AT5G65640.1 | 0.6   |
| CcbHLH038 | CcbHLH115 | AT3G47640.2 | AT1G22490.1 | 0.514 |
| CcbHLH038 | CcbHLH148 | AT3G47640.2 | AT1G29950.2 | 0.416 |
| CcbHLH038 | CcbHLH110 | AT3G47640.2 | AT1G31050.1 | 0.609 |
| CcbHLH038 | CcbHLH059 | AT3G47640.2 | AT1G59640.2 | 0.473 |
| CcbHLH038 | CcbHLH052 | AT3G47640.2 | AT2G28160.1 | 0.797 |
| CcbHLH038 | CcbHLH144 | AT3G47640.2 | AT2G31730.1 | 0.598 |
| CcbHLH038 | CcbHLH138 | AT3G47640.2 | AT3G06120.1 | 0.687 |
| CcbHLH038 | CcbHLH080 | AT3G47640.2 | AT3G07340.1 | 0.517 |
| CcbHLH038 | CcbHLH112 | AT3G47640.2 | AT3G20640.1 | 0.434 |
| CcbHLH038 | CcbHLH064 | AT3G47640.2 | AT4G34530.1 | 0.559 |
| CcbHLH038 | CcbHLH056 | AT3G47640.2 | AT5G65640.1 | 0.679 |
| CcbHLH038 | CcbHLH092 | AT3G47640.2 | AT4G00050.1 | 0.682 |
| CcbHLH038 | CcbHLH122 | AT3G47640.2 | AT5G53210.1 | 0.738 |
| CcbHLH038 | CcbHLH120 | AT3G47640.2 | AT4G14410.1 | 0.747 |
| CcbHLH038 | CcbHLH081 | AT3G47640.2 | AT5G50915.1 | 0.784 |

|           |           |             |             |       |
|-----------|-----------|-------------|-------------|-------|
| CcbHLH038 | CcbHLH100 | AT3G47640.2 | AT4G02590.1 | 0.787 |
| CcbHLH038 | CcbHLH105 | AT3G47640.2 | AT5G54680.1 | 0.863 |
| CcbHLH038 | CcbHLH132 | AT3G47640.2 | AT3G56980.1 | 0.953 |
| CcbHLH038 | CcbHLH040 | AT3G47640.2 | AT3G56970.1 | 0.955 |
| CcbHLH040 | CcbHLH115 | AT3G56970.1 | AT1G22490.1 | 0.532 |
| CcbHLH040 | CcbHLH110 | AT3G56970.1 | AT1G31050.1 | 0.483 |
| CcbHLH040 | CcbHLH052 | AT3G56970.1 | AT2G28160.1 | 0.977 |
| CcbHLH040 | CcbHLH092 | AT3G56970.1 | AT4G00050.1 | 0.453 |
| CcbHLH040 | CcbHLH132 | AT3G56970.1 | AT3G56980.1 | 0.498 |
| CcbHLH040 | CcbHLH081 | AT3G56970.1 | AT5G50915.1 | 0.591 |
| CcbHLH040 | CcbHLH055 | AT3G56970.1 | AT4G37850.1 | 0.594 |
| CcbHLH040 | CcbHLH120 | AT3G56970.1 | AT4G14410.1 | 0.914 |
| CcbHLH040 | CcbHLH105 | AT3G56970.1 | AT5G54680.1 | 0.929 |
| CcbHLH043 | CcbHLH115 | AT5G51780.1 | AT1G22490.1 | 0.659 |
| CcbHLH043 | CcbHLH148 | AT5G51780.1 | AT1G29950.2 | 0.616 |
| CcbHLH043 | CcbHLH146 | AT5G51780.1 | AT1G68810.1 | 0.581 |
| CcbHLH043 | CcbHLH112 | AT5G51780.1 | AT3G20640.1 | 0.634 |
| CcbHLH043 | CcbHLH093 | AT5G51780.1 | AT3G61950.1 | 0.65  |
| CcbHLH043 | CcbHLH081 | AT5G51780.1 | AT5G50915.1 | 0.601 |
| CcbHLH043 | CcbHLH056 | AT5G51780.1 | AT5G65640.1 | 0.429 |
| CcbHLH045 | CcbHLH099 | AT4G17880.1 | AT1G32640.1 | 0.546 |
| CcbHLH045 | CcbHLH081 | AT4G17880.1 | AT5G50915.1 | 0.626 |
| CcbHLH046 | CcbHLH109 | AT1G06170.2 | AT5G57150.4 | 0.402 |
| CcbHLH046 | CcbHLH116 | AT1G06170.2 | AT2G16910.1 | 0.43  |
| CcbHLH046 | CcbHLH108 | AT1G06170.2 | AT2G24260.1 | 0.484 |
| CcbHLH046 | CcbHLH146 | AT1G06170.2 | AT1G68810.1 | 0.506 |
| CcbHLH046 | CcbHLH096 | AT1G06170.2 | AT5G43650.1 | 0.516 |
| CcbHLH046 | CcbHLH136 | AT1G06170.2 | AT1G09250.1 | 0.629 |
| CcbHLH050 | CcbHLH105 | AT1G49770.1 | AT5G54680.1 | 0.461 |
| CcbHLH050 | CcbHLH095 | AT1G49770.1 | AT2G31220.1 | 0.545 |
| CcbHLH050 | CcbHLH054 | AT1G49770.1 | AT4G33880.1 | 0.679 |
| CcbHLH050 | CcbHLH062 | AT1G49770.1 | AT2G14760.3 | 0.679 |
| CcbHLH050 | CcbHLH082 | AT1G49770.1 | AT3G26744.1 | 0.913 |
| CcbHLH052 | CcbHLH063 | AT2G28160.1 | AT1G27660.1 | 0.749 |
| CcbHLH052 | CcbHLH120 | AT2G28160.1 | AT4G14410.1 | 0.637 |
| CcbHLH052 | CcbHLH105 | AT2G28160.1 | AT5G54680.1 | 0.68  |
| CcbHLH052 | CcbHLH132 | AT2G28160.1 | AT3G56980.1 | 0.959 |
| CcbHLH054 | CcbHLH134 | AT4G33880.1 | AT1G63650.3 | 0.548 |
| CcbHLH054 | CcbHLH077 | AT4G33880.1 | AT1G66470.1 | 0.568 |
| CcbHLH054 | CcbHLH134 | AT4G33880.1 | AT4G00480.2 | 0.429 |
| CcbHLH054 | CcbHLH094 | AT4G33880.1 | AT5G51790.1 | 0.52  |
| CcbHLH054 | CcbHLH134 | AT4G33880.1 | AT5G41315.1 | 0.581 |
| CcbHLH054 | CcbHLH131 | AT4G33880.1 | AT5G58010.1 | 0.592 |
| CcbHLH055 | CcbHLH110 | AT4G37850.1 | AT1G31050.1 | 0.62  |
| CcbHLH055 | CcbHLH146 | AT4G37850.1 | AT1G68810.1 | 0.465 |
| CcbHLH055 | CcbHLH139 | AT4G37850.1 | AT1G68920.1 | 0.568 |

|           |           |             |             |       |
|-----------|-----------|-------------|-------------|-------|
| CcbHLH055 | CcbHLH112 | AT4G37850.1 | AT3G20640.1 | 0.548 |
| CcbHLH055 | CcbHLH132 | AT4G37850.1 | AT3G56980.1 | 0.463 |
| CcbHLH055 | CcbHLH100 | AT4G37850.1 | AT4G02590.1 | 0.465 |
| CcbHLH055 | CcbHLH120 | AT4G37850.1 | AT4G14410.1 | 0.463 |
| CcbHLH055 | CcbHLH064 | AT4G37850.1 | AT4G34530.1 | 0.597 |
| CcbHLH055 | CcbHLH105 | AT4G37850.1 | AT5G54680.1 | 0.441 |
| CcbHLH056 | CcbHLH148 | AT5G65640.1 | AT1G29950.2 | 0.564 |
| CcbHLH056 | CcbHLH141 | AT5G65640.1 | AT1G73830.1 | 0.506 |
| CcbHLH056 | CcbHLH058 | AT5G65640.1 | AT2G42280.1 | 0.615 |
| CcbHLH056 | CcbHLH138 | AT5G65640.1 | AT3G06120.1 | 0.548 |
| CcbHLH056 | CcbHLH112 | AT5G65640.1 | AT3G20640.1 | 0.52  |
| CcbHLH056 | CcbHLH142 | AT5G65640.1 | AT3G24140.1 | 0.831 |
| CcbHLH056 | CcbHLH081 | AT5G65640.1 | AT5G50915.1 | 0.569 |
| CcbHLH056 | CcbHLH122 | AT5G65640.1 | AT5G53210.1 | 0.447 |
| CcbHLH059 | CcbHLH119 | AT1G59640.2 | AT1G06150.1 | 0.463 |
| CcbHLH059 | CcbHLH110 | AT1G59640.2 | AT1G31050.1 | 0.576 |
| CcbHLH059 | CcbHLH117 | AT1G59640.2 | AT3G19860.2 | 0.402 |
| CcbHLH059 | CcbHLH149 | AT1G59640.2 | AT3G06590.2 | 0.467 |
| CcbHLH059 | CcbHLH144 | AT1G59640.2 | AT2G31730.1 | 0.485 |
| CcbHLH059 | CcbHLH122 | AT1G59640.2 | AT5G53210.1 | 0.485 |
| CcbHLH062 | CcbHLH146 | AT2G14760.3 | AT1G68810.1 | 0.541 |
| CcbHLH062 | CcbHLH134 | AT2G14760.3 | AT5G41315.1 | 0.452 |
| CcbHLH062 | CcbHLH105 | AT2G14760.3 | AT5G54680.1 | 0.519 |
| CcbHLH062 | CcbHLH134 | AT2G14760.3 | AT4G00480.2 | 0.564 |
| CcbHLH064 | CcbHLH149 | AT4G34530.1 | AT3G06590.2 | 0.5   |
| CcbHLH064 | CcbHLH080 | AT4G34530.1 | AT3G07340.1 | 0.573 |
| CcbHLH064 | CcbHLH117 | AT4G34530.1 | AT3G19860.2 | 0.515 |
| CcbHLH064 | CcbHLH134 | AT4G34530.1 | AT5G41315.1 | 0.524 |
| CcbHLH064 | CcbHLH122 | AT4G34530.1 | AT5G53210.1 | 0.562 |
| CcbHLH072 | CcbHLH098 | AT4G16430.1 | AT2G34820.1 | 0.446 |
| CcbHLH072 | CcbHLH074 | AT4G16430.1 | AT5G08130.5 | 0.441 |
| CcbHLH074 | CcbHLH139 | AT5G08130.5 | AT1G68920.1 | 0.519 |
| CcbHLH074 | CcbHLH140 | AT5G08130.5 | AT1G69010.1 | 0.57  |
| CcbHLH074 | CcbHLH141 | AT5G08130.5 | AT1G73830.1 | 0.593 |
| CcbHLH074 | CcbHLH095 | AT5G08130.5 | AT2G31220.1 | 0.461 |
| CcbHLH074 | CcbHLH079 | AT5G08130.5 | AT2G43010.1 | 0.616 |
| CcbHLH074 | CcbHLH105 | AT5G08130.5 | AT5G54680.1 | 0.441 |
| CcbHLH077 | CcbHLH110 | AT1G66470.1 | AT1G31050.1 | 0.501 |
| CcbHLH077 | CcbHLH134 | AT1G66470.1 | AT1G63650.3 | 0.63  |
| CcbHLH077 | CcbHLH108 | AT1G66470.1 | AT2G24260.1 | 0.405 |
| CcbHLH077 | CcbHLH096 | AT1G66470.1 | AT5G43650.1 | 0.483 |
| CcbHLH077 | CcbHLH134 | AT1G66470.1 | AT4G00480.2 | 0.54  |
| CcbHLH077 | CcbHLH131 | AT1G66470.1 | AT5G58010.1 | 0.607 |
| CcbHLH077 | CcbHLH134 | AT1G66470.1 | AT5G41315.1 | 0.62  |
| CcbHLH079 | CcbHLH137 | AT2G43010.1 | AT1G09530.2 | 0.965 |
| CcbHLH079 | CcbHLH150 | AT2G43010.1 | AT2G20180.2 | 0.664 |

|           |           |             |             |       |
|-----------|-----------|-------------|-------------|-------|
| CcbHLH079 | CcbHLH122 | AT2G43010.1 | AT5G53210.1 | 0.428 |
| CcbHLH080 | CcbHLH110 | AT3G07340.1 | AT1G31050.1 | 0.515 |
| CcbHLH080 | CcbHLH144 | AT3G07340.1 | AT2G31730.1 | 0.4   |
| CcbHLH080 | CcbHLH122 | AT3G07340.1 | AT5G53210.1 | 0.407 |
| CcbHLH080 | CcbHLH128 | AT3G07340.1 | AT4G20970.1 | 0.651 |
| CcbHLH081 | CcbHLH126 | AT5G50915.1 | AT1G10586.1 | 0.624 |
| CcbHLH081 | CcbHLH115 | AT5G50915.1 | AT1G22490.1 | 0.514 |
| CcbHLH081 | CcbHLH148 | AT5G50915.1 | AT1G29950.2 | 0.545 |
| CcbHLH081 | CcbHLH110 | AT5G50915.1 | AT1G31050.1 | 0.609 |
| CcbHLH081 | CcbHLH099 | AT5G50915.1 | AT1G32640.1 | 0.425 |
| CcbHLH081 | CcbHLH146 | AT5G50915.1 | AT1G68810.1 | 0.565 |
| CcbHLH081 | CcbHLH144 | AT5G50915.1 | AT2G31730.1 | 0.576 |
| CcbHLH081 | CcbHLH138 | AT5G50915.1 | AT3G06120.1 | 0.72  |
| CcbHLH081 | CcbHLH112 | AT5G50915.1 | AT3G20640.1 | 0.721 |
| CcbHLH081 | CcbHLH082 | AT5G50915.1 | AT3G26744.1 | 0.622 |
| CcbHLH081 | CcbHLH132 | AT5G50915.1 | AT3G56980.1 | 0.591 |
| CcbHLH081 | CcbHLH134 | AT5G50915.1 | AT4G00480.2 | 0.686 |
| CcbHLH081 | CcbHLH134 | AT5G50915.1 | AT4G09820.1 | 0.494 |
| CcbHLH081 | CcbHLH134 | AT5G50915.1 | AT5G41315.1 | 0.565 |
| CcbHLH081 | CcbHLH122 | AT5G50915.1 | AT5G53210.1 | 0.597 |
| CcbHLH082 | CcbHLH138 | AT3G26744.1 | AT3G06120.1 | 0.966 |
| CcbHLH082 | CcbHLH142 | AT3G26744.1 | AT3G24140.1 | 0.722 |
| CcbHLH082 | CcbHLH093 | AT3G26744.1 | AT3G61950.1 | 0.449 |
| CcbHLH082 | CcbHLH105 | AT3G26744.1 | AT5G54680.1 | 0.55  |
| CcbHLH082 | CcbHLH122 | AT3G26744.1 | AT5G53210.1 | 0.983 |
| CcbHLH091 | CcbHLH146 | AT2G31210.1 | AT1G68810.1 | 0.551 |
| CcbHLH091 | CcbHLH116 | AT2G31210.1 | AT2G16910.1 | 0.439 |
| CcbHLH091 | CcbHLH108 | AT2G31210.1 | AT2G24260.1 | 0.518 |
| CcbHLH091 | CcbHLH109 | AT2G31210.1 | AT5G57150.4 | 0.431 |
| CcbHLH091 | CcbHLH096 | AT2G31210.1 | AT5G43650.1 | 0.535 |
| CcbHLH092 | CcbHLH119 | AT4G00050.1 | AT1G06150.1 | 0.594 |
| CcbHLH092 | CcbHLH138 | AT4G00050.1 | AT3G06120.1 | 0.432 |
| CcbHLH092 | CcbHLH105 | AT4G00050.1 | AT5G54680.1 | 0.416 |
| CcbHLH092 | CcbHLH122 | AT4G00050.1 | AT5G53210.1 | 0.66  |
| CcbHLH093 | CcbHLH145 | AT3G61950.1 | AT1G01260.1 | 0.519 |
| CcbHLH093 | CcbHLH139 | AT3G61950.1 | AT1G68920.1 | 0.582 |
| CcbHLH093 | CcbHLH109 | AT3G61950.1 | AT5G57150.4 | 0.553 |
| CcbHLH095 | CcbHLH146 | AT2G31220.1 | AT1G68810.1 | 0.621 |
| CcbHLH095 | CcbHLH116 | AT2G31220.1 | AT2G16910.1 | 0.429 |
| CcbHLH095 | CcbHLH109 | AT2G31220.1 | AT5G57150.4 | 0.402 |
| CcbHLH095 | CcbHLH096 | AT2G31220.1 | AT5G43650.1 | 0.516 |
| CcbHLH096 | CcbHLH115 | AT5G43650.1 | AT1G22490.1 | 0.514 |
| CcbHLH096 | CcbHLH109 | AT5G43650.1 | AT5G57150.4 | 0.963 |
| CcbHLH100 | CcbHLH110 | AT4G02590.1 | AT1G31050.1 | 0.79  |
| CcbHLH100 | CcbHLH105 | AT4G02590.1 | AT5G54680.1 | 0.542 |
| CcbHLH105 | CcbHLH140 | AT5G54680.1 | AT1G69010.1 | 0.451 |

|           |           |             |             |       |
|-----------|-----------|-------------|-------------|-------|
| CcbHLH105 | CcbHLH132 | AT5G54680.1 | AT3G56980.1 | 0.871 |
| CcbHLH105 | CcbHLH120 | AT5G54680.1 | AT4G14410.1 | 0.558 |
| CcbHLH108 | CcbHLH134 | AT2G24260.1 | AT4G00480.2 | 0.459 |
| CcbHLH109 | CcbHLH110 | AT5G57150.4 | AT1G31050.1 | 0.618 |
| CcbHLH109 | CcbHLH139 | AT5G57150.4 | AT1G68920.1 | 0.55  |
| CcbHLH109 | CcbHLH140 | AT5G57150.4 | AT1G69010.1 | 0.556 |
| CcbHLH109 | CcbHLH131 | AT5G57150.4 | AT5G58010.1 | 0.515 |
| CcbHLH110 | CcbHLH115 | AT1G31050.1 | AT1G22490.1 | 0.514 |
| CcbHLH110 | CcbHLH132 | AT1G31050.1 | AT3G56980.1 | 0.513 |
| CcbHLH110 | CcbHLH122 | AT1G31050.1 | AT5G53210.1 | 0.605 |
| CcbHLH110 | CcbHLH146 | AT1G31050.1 | AT1G68810.1 | 0.643 |
| CcbHLH112 | CcbHLH148 | AT3G20640.1 | AT1G29950.2 | 0.637 |
| CcbHLH112 | CcbHLH146 | AT3G20640.1 | AT1G68810.1 | 0.637 |
| CcbHLH112 | CcbHLH139 | AT3G20640.1 | AT1G68920.1 | 0.581 |
| CcbHLH119 | CcbHLH139 | AT1G06150.1 | AT1G68920.1 | 0.549 |
| CcbHLH120 | CcbHLH132 | AT4G14410.1 | AT3G56980.1 | 0.872 |
| CcbHLH122 | CcbHLH137 | AT5G53210.1 | AT1G09530.2 | 0.447 |
| CcbHLH122 | CcbHLH144 | AT5G53210.1 | AT2G31730.1 | 0.485 |
| CcbHLH122 | CcbHLH132 | AT5G53210.1 | AT3G56980.1 | 0.415 |
| CcbHLH122 | CcbHLH128 | AT5G53210.1 | AT4G20970.1 | 0.507 |
| CcbHLH126 | CcbHLH134 | AT1G10586.1 | AT4G09820.1 | 0.546 |
| CcbHLH137 | CcbHLH138 | AT1G09530.2 | AT3G06120.1 | 0.43  |
| CcbHLH137 | CcbHLH150 | AT1G09530.2 | AT2G20180.2 | 0.648 |
| CcbHLH139 | CcbHLH146 | AT1G68920.1 | AT1G68810.1 | 0.526 |
| CcbHLH139 | CcbHLH149 | AT1G68920.1 | AT3G06590.2 | 0.623 |
| CcbHLH140 | CcbHLH148 | AT1G69010.1 | AT1G29950.2 | 0.487 |
| CcbHLH140 | CcbHLH146 | AT1G69010.1 | AT1G68810.1 | 0.617 |
| CcbHLH146 | CcbHLH148 | AT1G68810.1 | AT1G29950.2 | 0.627 |

---

**Table S7.** IIIf subfamily *CcbHLHs* protein interaction analysis

| <i>Cinnamomun<br/>camphora</i> protein | <i>Arabidopsis<br/>thaliana</i> protein | identity | bitscore | Preferred<br>Name |
|----------------------------------------|-----------------------------------------|----------|----------|-------------------|
| CcbHLH001                              | AT5G41315.1                             | 43.2     | 462.2    | GL3               |
| CcbHLH001                              | AT1G63650.3                             | 42.9     | 449.1    | EGL3              |
| CcbHLH001                              | AT4G00480.2                             | 33.7     | 274.6    | ATMYC1            |
| CcbHLH001                              | AT4G09820.1                             | 31.2     | 261.2    | TT8               |
| CcbHLH022                              | AT4G09820.1                             | 42       | 387.9    | TT8               |
| CcbHLH022                              | AT1G63650.3                             | 29.9     | 258.1    | EGL3              |
| CcbHLH022                              | AT5G41315.1                             | 29.3     | 249.6    | GL3               |
| CcbHLH022                              | AT4G00480.2                             | 22.3     | 142.9    | ATMYC1            |
| CcbHLH118                              | AT5G41315.1                             | 39.2     | 395.6    | GL3               |
| CcbHLH118                              | AT1G63650.3                             | 39       | 385.2    | EGL3              |
| CcbHLH118                              | AT4G00480.2                             | 30.3     | 235.7    | ATMYC1            |
| CcbHLH118                              | AT4G09820.1                             | 28.7     | 224.6    | TT8               |
| CcbHLH134                              | AT4G09820.1                             | 40.3     | 401.7    | TT8               |
| CcbHLH134                              | AT5G41315.1                             | 29.1     | 268.9    | GL3               |
| CcbHLH134                              | AT1G63650.3                             | 30.2     | 261.5    | EGL3              |
| CcbHLH134                              | AT4G00480.2                             | 22.4     | 141.7    | ATMYC1            |

**Table S8.** The primers used in the qRT-PCR.

| Name          | Sequence                 |
|---------------|--------------------------|
| q-CcbHLH001-F | CAATCCCGTGAAGGTTGTGC     |
| q-CcbHLH001-R | TGAAAGGGTCTTCGTGTAGTGAGG |
| q-CcbHLH015-F | CAGCAATAGAACTTTGGTGGGC   |
| q-CcbHLH015-R | TCTGCCTCGAATCCATCGGTAT   |
| q-CcbHLH017-F | GCTGGTCGAGCTGGGTCTATTC   |
| q-CcbHLH017-R | GCTTTATCCGTTTTGGTGGTGC   |
| q-CcbHLH022-F | ATGGAGGTAAGCACTGAGGAGGC  |
| q-CcbHLH022-R | CAGGTGGGAAGGAGAAGGAGACA  |
| q-CcbHLH101-F | CTGCTCAGGTCCACAATCTTTCAG |
| q-CcbHLH101-R | TCATGCCACTCCCCATCCAC     |
| q-CcbHLH118-F | GAGTTACGGTGTCTGTGGAGGG   |
| q-CcbHLH118-R | ATGTCAACGTCAAGGTCAGGAAT  |
| q-CcbHLH134-F | TGGATGGGGTCCTTGAACCTCG   |
| q-CcbHLH134-R | TGCAGGCTTGGGGAAGTGGT     |
| ACT-F         | GTACAGTGTCTGGATTGGAGGCTC |
| ACT-R         | CTGCCAGTCTTCACATGATCAGAA |
